# Supplementary material
Source: PubMed Central journal article supplement (PMC4990471)
Supplement: NIHMS777753-supplement-1.pdf [file NIHMS777753-supplement-1.pdf]

**SUPPLEMENTARY INFORMATION**

**Tbx16 regulates *hox* gene activation in mesodermal progenitor cells**

Alexander Y. Payumo<sup>†</sup>, Lindsey E. McQuade<sup>†,§</sup>, Whitney J. Walker<sup>†</sup>

Sayumi Yamazoe<sup>†</sup>, and James K. Chen<sup>\*,†,‡</sup>

<sup>†</sup>Department of Chemical and Systems Biology, Stanford University School of Medicine, Stanford, CA 94305, USA

<sup>‡</sup>Department of Developmental Biology, Stanford University School of Medicine, Stanford, CA 94305, USA

<sup>§</sup>Present address: Department of Chemistry, University of Illinois, Chicago, IL 60607, USA

\*Corresponding author. Department of Chemical and Systems Biology, Stanford University School of Medicine, 269 Campus Drive, CCSR 3155, Stanford, CA 94305, USA. Tel: 650-725-3582. Fax: 650-723-2253. Email: jameschen@stanford.edu.

## SUPPLEMENTARY RESULTS

|                                       |       |
|---------------------------------------|-------|
| <b>Supplementary Table 1</b> .....    | 3-5   |
| <b>Supplementary Table 2</b> .....    | 6-8   |
| <b>Supplementary Table 3</b> .....    | 9-11  |
| <b>Supplementary Figure 1</b> .....   | 12    |
| <b>Supplementary Figure 2</b> .....   | 13    |
| <b>Supplementary Figure 3</b> .....   | 14    |
| <b>Supplementary Figure 4</b> .....   | 15    |
| <b>Supplementary Figure 5</b> .....   | 16    |
| <b>Supplementary Figure 6</b> .....   | 17    |
| <b>Supplementary Figure 7</b> .....   | 18    |
| <b>Supplementary Figure 8</b> .....   | 19    |
| <b>Supplementary Figure 9</b> .....   | 20    |
| <b>Supplementary Figure 10</b> .....  | 21    |
| <b>Supplementary Figure 11</b> .....  | 22    |
| <b>Supplementary Figure 12</b> .....  | 23    |
| <b>Supplementary Figure 13</b> .....  | 24    |
| <b>Supplementary Figure 14</b> .....  | 25    |
| <b>Supplementary Figure 15</b> .....  | 26    |
| <b>Supplementary Figure 16</b> .....  | 27    |
| <b>Supplementary Movies 1-3</b> ..... | 28-29 |
| <b>References</b> .....               | 30-35 |

**Supplementary Table 1. cFD vs. *tbx16* cMO + cFD comparison at 9 hpf: 64 downregulated genes ranked by fold-change**

Sequences were aligned to zebrafish genome assembly Zv8. False-discovery rate < 0.01.

\*Confirmation by whole-mount *in situ* hybridization

| Entry | RefSeqID     | Gene symbol            | Gene description                                                   | Fold change | Expression pattern during gastrulation and somitogenesis | Embryonic function                   | Functional annotation in IPA                  | Previously known Tbx16 target? | Validated in this study?* |
|-------|--------------|------------------------|--------------------------------------------------------------------|-------------|----------------------------------------------------------|--------------------------------------|-----------------------------------------------|--------------------------------|---------------------------|
| 1     | NM_214786    | <i>asic4b</i>          | acid sensing (proton-gated) ion channel family member 4b           | -19.83      |                                                          |                                      |                                               |                                |                           |
| 2     | NM_001204257 | <i>ppp1r13ba</i>       | protein phosphatase 1, regulatory subunit 13Ba                     | -7.17       | ventral anterior mesoderm <sup>1</sup>                   |                                      |                                               |                                |                           |
| 3     | NM_182885    | <i>pcdh10b</i>         | protocadherin 10b                                                  | -4.80       | paraxial mesoderm                                        | somitogenesis <sup>2</sup>           |                                               | Yes <sup>3,4</sup>             | Yes                       |
| 4     | NM_001166446 | <i>si:dkey-261j4.4</i> | si:dkey-261j4.4                                                    | -4.48       |                                                          |                                      |                                               |                                |                           |
| 5     | NR_030084    | <i>mir133b</i>         | microRNA 133b                                                      | -4.45       |                                                          | myogenesis <sup>5</sup>              |                                               |                                |                           |
| 6     | NM_001039109 | <i>rippy2</i>          | rippy2                                                             | -4.17       | paraxial mesoderm                                        | somitogenesis <sup>6</sup>           |                                               |                                | Yes                       |
| 7     | NM_131209    | <i>pcdh8</i>           | protocadherin 8                                                    | -4.17       | ventrolateral margin <sup>7</sup>                        | gastrulation movements <sup>8</sup>  |                                               | Yes <sup>3,4</sup>             |                           |
| 8     | NM_001166445 | <i>si:dkey-261j4.3</i> | si:dkey-261j4.3                                                    | -3.80       |                                                          |                                      |                                               |                                |                           |
| 9     | NM_130972    | <i>tcf15</i>           | transcription factor 15 (basic helix-loop-helix)                   | -3.68       | paraxial mesoderm <sup>9</sup>                           |                                      | AP patterning, myogenesis, somitogenesis      |                                |                           |
| 10    | NM_001003886 | <i>her11</i>           | hairy-related 11                                                   | -3.56       | paraxial mesoderm                                        | somitogenesis <sup>10</sup>          |                                               |                                | Yes                       |
| 11    | NM_001113337 | <i>cyp27c1</i>         | cytochrome P450, family 27, subfamily C, polypeptide 1             | -3.39       | margin <sup>11</sup>                                     |                                      |                                               |                                |                           |
| 12    | NM_173227    | <i>sebox</i>           | SEBOX homeobox                                                     | -3.12       | margin <sup>12</sup>                                     |                                      |                                               |                                |                           |
| 13    | NM_200965    | <i>atp2a2a</i>         | ATPase, Ca++ transporting, cardiac muscle, slow twitch 2a          | -3.09       | paraxial mesoderm, tailbud                               |                                      |                                               |                                | Yes                       |
| 14    | NM_212733    | <i>tpd52l2a</i>        | tumor protein D52-like 2a                                          | -3.05       | unspecified <sup>13</sup>                                |                                      |                                               |                                |                           |
| 15    | NM_001082947 | <i>nr0b1</i>           | nuclear receptor subfamily 0, group B, member 1                    | -2.99       | ubiquitous <sup>14</sup>                                 |                                      |                                               |                                |                           |
| 16    | NM_182882    | <i>msgn1</i>           | mesogenin 1                                                        | -2.96       | tailbud                                                  | somitogenesis <sup>15,16</sup>       | myogenesis, somitogenesis                     | Yes <sup>3,4</sup>             | Yes                       |
| 17    | NM_001110166 | <i>calcoco1a</i>       | calcium binding and coiled-coil domain 1a                          | -2.64       |                                                          |                                      |                                               |                                |                           |
| 18    | NM_213274    | <i>cldn5a</i>          | claudin 5a                                                         | -2.62       | axial mesoderm, tailbud <sup>13</sup>                    |                                      |                                               |                                |                           |
| 19    | NM_153650    | <i>has2</i>            | hyaluronan synthase 2                                              | -2.55       | ventrolateral margin <sup>9</sup>                        | gastrulation movements <sup>17</sup> | myogenesis, epithelial-mesenchymal transition |                                |                           |
| 20    | NM_001080012 | <i>hhp</i>             | hedgehog interacting protein                                       | -2.51       | adaxial, lateral mesoderm <sup>18</sup>                  | myogenesis <sup>18</sup>             |                                               |                                |                           |
| 21    | NM_178307    | <i>cxcl12a</i>         | chemokine (C-X-C motif) ligand 12a (stromal cell-derived factor 1) | -2.51       | paraxial mesoderm                                        | myogenesis <sup>19</sup>             |                                               |                                | Yes                       |
| 22    | NM_131037    | <i>fsta</i>            | follicle-stimulating hormone receptor 1-like 3                     | -2.43       | paraxial mesoderm                                        |                                      | myogenesis                                    |                                | Yes                       |
| 23    | NM_001033727 | <i>draxin</i>          | dorsal inhibitor axon guidance protein                             | -2.38       | paraxial mesoderm <sup>20</sup>                          |                                      |                                               |                                |                           |
| 24    | NM_200860    | <i>arl4aa</i>          | ADP-ribosylation factor-like 4aa                                   | -2.34       | axial, paraxial mesoderm <sup>13</sup>                   |                                      |                                               |                                |                           |
| 25    | NM_213153    | <i>dnase1l3</i>        | deoxyribonuclease 1-like 3                                         | -2.11       | Kupffer's vesicle <sup>13</sup>                          |                                      |                                               |                                |                           |
| 26    | NM_173283    | <i>igfbp1a</i>         | insulin-like growth factor binding protein 1a                      | -2.11       | adaxial mesoderm <sup>1</sup>                            |                                      |                                               |                                |                           |
| 27    | NM_198911    | <i>sept9a</i>          | septin 9a                                                          | -2.08       | axial, ventral                                           |                                      |                                               |                                |                           |

|    |              |                |                                                                       |       |                                                         |                                      |                                          |                    |     |
|----|--------------|----------------|-----------------------------------------------------------------------|-------|---------------------------------------------------------|--------------------------------------|------------------------------------------|--------------------|-----|
|    |              |                |                                                                       |       | mesoderm <sup>1</sup>                                   |                                      |                                          |                    |     |
| 28 | NM_001001409 | <i>actc1a</i>  | actin, alpha, cardiac muscle 1a                                       | -2.07 | adaxial mesoderm                                        |                                      | myogenesis                               |                    | Yes |
| 29 | NM_001098388 | <i>zcchc24</i> | zinc finger, CCHC domain containing 24                                | -2.06 |                                                         |                                      |                                          |                    |     |
| 30 | NM_205585    | <i>sfrp1a</i>  | secreted frizzled-related protein 1a                                  | -2.03 | paraxial mesoderm <sup>21</sup>                         |                                      | AP patterning, somitogenesis             |                    |     |
| 31 | NM_001002366 | <i>tjp2b</i>   | tight junction protein 2b (zona occludens 2)                          | -1.98 | paraxial mesoderm <sup>13</sup>                         |                                      |                                          |                    |     |
| 32 | NM_131728    | <i>foxc1a</i>  | forkhead box C1a                                                      | -1.96 | paraxial mesoderm <sup>13</sup>                         | somitogenesis <sup>22</sup>          | myogenesis                               | Yes <sup>23</sup>  |     |
| 33 | NM_201174    | <i>rem1</i>    | RAS (RAD and GEM)-like GTP-binding 1                                  | -1.93 | paraxial mesoderm, tailbud                              |                                      |                                          |                    | Yes |
| 34 | NM_001003532 | <i>desi2</i>   | desumoylating isopeptidase 2                                          | -1.93 | dorsoventral margin <sup>1</sup>                        | gastrulation movements <sup>23</sup> |                                          |                    |     |
| 35 | NM_131233    | <i>gata2a</i>  | GATA binding protein 2a                                               | -1.89 | ventral region <sup>24</sup>                            |                                      |                                          |                    |     |
| 36 | NM_131850    | <i>aldh1a2</i> | aldehyde dehydrogenase 1                                              | -1.87 | paraxial mesoderm <sup>25</sup>                         | AP patterning <sup>26</sup>          | AP patterning, myogenesis, somitogenesis | Yes <sup>4</sup>   |     |
| 37 | NM_131729    | <i>foxc1b</i>  | forkhead box C1b                                                      | -1.86 | adaxial, paraxial mesoderm                              |                                      | myogenesis                               |                    | Yes |
| 38 | NM_001115094 | <i>notch2</i>  | notch homolog 2                                                       | -1.86 | axial, paraxial mesoderm                                |                                      | epithelial-mesenchymal transition        |                    | Yes |
| 39 | NM_001013521 | <i>enah</i>    | enabled homolog (Drosophila)                                          | -1.84 | paraxial mesoderm <sup>27</sup>                         |                                      |                                          |                    |     |
| 40 | NM_130917    | <i>fzd10</i>   | frizzled class receptor 10                                            | -1.84 | tailbud                                                 |                                      |                                          |                    |     |
| 41 | NM_131269    | <i>tcf7l1a</i> | transcription factor 7-like 1a                                        | -1.80 | axial, paraxial mesoderm <sup>13</sup>                  |                                      |                                          |                    |     |
| 42 | NM_001013555 | <i>aoc2</i>    | amine oxidase, copper containing 2                                    | -1.79 |                                                         |                                      |                                          |                    |     |
| 43 | NM_130960    | <i>lft1</i>    | lefty1                                                                | -1.79 | axial mesoderm, margin <sup>1</sup>                     | gastrulation movements <sup>28</sup> |                                          |                    |     |
| 44 | NM_131052    | <i>tbx6l</i>   | T-box 6, like                                                         | -1.78 | paraxial mesoderm, tailbud                              |                                      |                                          | Yes <sup>3,4</sup> | Yes |
| 45 | NM_001265583 | <i>mespab</i>  | mesoderm posterior ab                                                 | -1.74 | paraxial mesoderm                                       |                                      |                                          |                    | Yes |
| 46 | NM_001002389 | <i>ip6k2b</i>  | inositol hexakisphosphate kinase 2b                                   | -1.74 | axial mesoderm <sup>13</sup>                            |                                      |                                          |                    |     |
| 47 | NM_182871    | <i>fgf24</i>   | fibroblast growth factor 24                                           | -1.74 | margin, prechordal plate <sup>9</sup>                   | AP patterning <sup>29</sup>          |                                          | Yes <sup>29</sup>  |     |
| 48 | NM_001007063 | <i>magi1b</i>  | membrane associated guanylate kinase, WW and PDZ domain containing 1b | -1.73 |                                                         |                                      |                                          |                    |     |
| 49 | NM_001042746 | <i>tshz1</i>   | teashirt zinc finger                                                  | -1.71 | neural tube <sup>30</sup>                               |                                      | AP patterning                            |                    |     |
| 50 | NM_131893    | <i>meis1b</i>  | Meis homeobox 1 b                                                     | -1.71 | paraxial mesoderm                                       |                                      |                                          |                    |     |
| 51 | NM_213495    | <i>cul1b</i>   | cullin 1b                                                             | -1.71 | unspecified <sup>13</sup>                               |                                      |                                          |                    |     |
| 52 | NM_199429    | <i>pigq</i>    | phosphatidylinositol glycan anchor biosynthesis, class Q              | -1.68 | ventral mesoderm <sup>1</sup>                           |                                      |                                          |                    |     |
| 53 | NM_001075105 | <i>aplnra</i>  | apelin receptor a                                                     | -1.67 | adaxial mesoderm                                        | gastrulation movements <sup>31</sup> |                                          |                    | Yes |
| 54 | NM_213248    | <i>arl4cb</i>  | ADP-ribosylation factor-like 4Cb                                      | -1.64 | eye, neural tube <sup>13</sup>                          |                                      |                                          |                    |     |
| 55 | NM_001013261 | <i>fn1b</i>    | fibronectin 1b                                                        | -1.62 | paraxial mesoderm <sup>13</sup>                         | somitogenesis <sup>32</sup>          |                                          |                    |     |
| 56 | NM_001077794 | <i>dact2</i>   | dishevelled-binding antagonist of beta-catenin 2                      | -1.61 | tailbud, notochord, intermediate mesoderm <sup>33</sup> |                                      |                                          |                    |     |
| 57 | NM_001006044 | <i>cln5b</i>   | claudin 5b                                                            | -1.60 | ventral mesoderm <sup>13</sup>                          |                                      |                                          |                    |     |
| 58 | NM_199521    | <i>siah1</i>   | siah E3 ubiquitin protein ligase 1                                    | -1.60 | ventrolateral margin <sup>27</sup>                      |                                      |                                          |                    |     |
| 59 | NM_001030197 | <i>aplnrb</i>  | apelin receptor b                                                     | -1.57 | adaxial mesoderm                                        | gastrulation movements <sup>34</sup> |                                          |                    | Yes |
| 60 | NM_131718    | <i>six4a</i>   | SIX homeobox 4a                                                       | -1.55 | paraxial mesoderm <sup>35</sup>                         |                                      | myogenesis                               |                    |     |

|    |              |              |                                       |       |                                   |                                      |  |                    |     |
|----|--------------|--------------|---------------------------------------|-------|-----------------------------------|--------------------------------------|--|--------------------|-----|
| 61 | NM_001172683 | <i>tcf3b</i> | transcription factor 3b               | -1.55 |                                   |                                      |  |                    |     |
| 62 | NM_131078    | <i>her1</i>  | hairy-related 1                       | -1.54 | ventrolateral margin <sup>9</sup> | somitogenesis <sup>36</sup>          |  | Yes <sup>3,4</sup> |     |
| 63 | NM_170763    | <i>fzd7b</i> | frizzled class receptor 7b            | -1.50 | paraxial mesoderm                 | gastrulation movements <sup>37</sup> |  |                    | Yes |
| 64 | NM_131564    | <i>appa</i>  | amyloid beta (A4) precursor protein a | -1.50 |                                   |                                      |  |                    |     |

**Supplementary Table 2. cFD vs. *tbx16* cMO + cFD comparison at 9 hpf: 60 upregulated genes ranked by fold-change**

Sequences were aligned to zebrafish genome assembly Zv8. False-discovery rate < 0.01.

\*Confirmation by whole-mount *in situ* hybridization

| Entry | RefSeqID     | Gene symbol       | Gene description                                                                                | Fold change | Expression pattern during gastrulation and somitogenesis | Embryonic function                      | Functional annotation in IPA                  | Previously known Tbx16 target? | Validated in this study?* |
|-------|--------------|-------------------|-------------------------------------------------------------------------------------------------|-------------|----------------------------------------------------------|-----------------------------------------|-----------------------------------------------|--------------------------------|---------------------------|
| 1     | NM_214777    | <i>b3gnt7l</i>    | UDP-GlcNAc:betaGal beta-1,3-N-acetylglucosaminyltransferase 7, like                             | 4.83        |                                                          |                                         |                                               |                                |                           |
| 2     | NM_213184    | <i>nfkbiaa</i>    | nuclear factor of kappa light polypeptide gene enhancer in B-cells inhibitor, alpha a (nfkbiaa) | 4.75        | tailbud <sup>13</sup>                                    |                                         | myogenesis, epithelial-mesenchymal transition |                                |                           |
| 3     | NM_001030164 | <i>hivp2a</i>     | human immunodeficiency virus type I enhancer bindingprotein 2a                                  | 4.58        | paraxial mesoderm <sup>9</sup>                           |                                         |                                               |                                | Yes                       |
| 4     | NM_001014353 | <i>alpi.1</i>     | alkaline phosphatase, intestinal, tandem duplicate 1                                            | 4.27        | adaxial mesoderm <sup>13</sup>                           |                                         |                                               |                                |                           |
| 5     | NM_001126448 | <i>lect1</i>      | leukocyte cell derived chemotaxin 1                                                             | 4.26        | axial mesoderm <sup>1</sup>                              |                                         |                                               |                                |                           |
| 6     | NM_001128784 | <i>sst6</i>       | somatostatin 6                                                                                  | 4.09        |                                                          |                                         |                                               |                                |                           |
| 7     | NM_131290    | <i>foxd3</i>      | forkhead box D3                                                                                 | 3.65        | ubiquitous, dorsal <sup>38</sup>                         |                                         |                                               |                                |                           |
| 8     | NM_131063    | <i>shha</i>       | sonice hedgehog a                                                                               | 3.62        | axial mesoderm <sup>39</sup>                             | Myogenesis <sup>39</sup>                | AP patterning, myogenesis                     |                                |                           |
| 9     | NM_001012367 | <i>mcamb</i>      | melanoma cell adhesion molecule b                                                               | 3.57        | lateral mesoderm, tailbud <sup>27</sup>                  |                                         | epithelial-mesenchymal transition             |                                |                           |
| 10    | NM_131155    | <i>hoxa10b</i>    | homeobox A10b                                                                                   | 3.17        | tailbud                                                  | AP patterning <sup>40</sup>             | AP patterning                                 |                                | Yes                       |
| 11    | NM_001089454 | <i>zgc:162707</i> | zgc:162707                                                                                      | 3.11        |                                                          |                                         |                                               |                                |                           |
| 12    | NM_001002219 | <i>htra1a</i>     | HtrA serine peptidase                                                                           | 3.08        | ubiquitous <sup>13</sup>                                 | AP patterning <sup>41</sup>             |                                               |                                |                           |
| 13    | NM_001020514 | <i>ncs1b</i>      | neuronal calcium sensor 1b                                                                      | 2.85        |                                                          |                                         |                                               |                                |                           |
| 14    | NM_001202417 | <i>marveld1</i>   | MARVEL domain containing 1                                                                      | 2.80        | ubiquitous, higher in neural plate <sup>13</sup>         |                                         |                                               |                                |                           |
| 15    | NM_131359    | <i>bmp2a</i>      | bone morphogenetic protein 2a                                                                   | 2.69        | margin, tailbud                                          |                                         | myogenesis, epithelial-mesenchymal transition |                                | Yes                       |
| 16    | NM_131194    | <i>hoxa13b</i>    | homeobox A13b                                                                                   | 2.67        | tailbud                                                  | AP patterning, myogenesis <sup>40</sup> |                                               |                                | Yes                       |
| 17    | NM_001029963 | <i>ppp1r14c</i>   | protein phosphatase 1, regulatory (inhibitor) subunit 14C                                       | 2.66        |                                                          |                                         |                                               |                                |                           |
| 18    | NM_131691    | <i>s1pr1</i>      | sphingosine-1-phosphate receptor                                                                | 2.62        |                                                          | gastrulation movements <sup>42</sup>    |                                               |                                | Yes                       |
| 19    | NM_131533    | <i>hoxa9b</i>     | homeobox A9b                                                                                    | 2.54        | tailbud                                                  | AP patterning <sup>40</sup>             |                                               |                                | Yes                       |
| 20    | NM_001100039 | <i>arid3c</i>     | AT rich interactive domain 3C (BRIGHT-like)                                                     | 2.50        |                                                          |                                         |                                               |                                |                           |
| 21    | NM_201332    | <i>rab32a</i>     | RAB32a, member RAS oncogene family                                                              | 2.43        | axial mesoderm <sup>1</sup>                              |                                         |                                               |                                |                           |
| 22    | NM_001254944 | <i>hoxc10a</i>    | homeobox C10a                                                                                   | 2.36        | tailbud                                                  | AP patterning <sup>40</sup>             | AP patterning                                 |                                | Yes                       |
| 23    | NM_199720    | <i>tagln3b</i>    | transgelin 3b                                                                                   | 2.26        | tailbud                                                  |                                         |                                               |                                | Yes                       |
| 24    | NM_001099344 | <i>kirrel3l</i>   | kin of IRRE like 3 like                                                                         | 2.09        | axial mesoderm                                           | myogenesis <sup>43</sup>                |                                               |                                |                           |
| 25    | NM_199658    | <i>insm1b</i>     | insulinoma-associated 1b                                                                        | 2.04        | neural tissue <sup>44</sup>                              |                                         |                                               |                                |                           |
| 26    | NM_200637    | <i>adam8a</i>     | ADAM metallopeptidase domain 8a                                                                 | 2.03        | tailbud                                                  |                                         |                                               |                                | Yes                       |
| 27    | NM_001130818 | <i>tspan7b</i>    | tetraspanin 7b                                                                                  | 2.02        | axial mesoderm <sup>13</sup>                             |                                         |                                               |                                |                           |

|    |              |                  |                                                                            |      |                                               |                             |                                   |                   |     |
|----|--------------|------------------|----------------------------------------------------------------------------|------|-----------------------------------------------|-----------------------------|-----------------------------------|-------------------|-----|
| 28 | NM_200810    | <i>ppp1r14ab</i> | protein phosphatase 1, regulatory (inhibitor) subunit 14Ab                 | 2.02 | ventral mesoderm, neural tissue <sup>13</sup> | AP patterning <sup>45</sup> |                                   |                   |     |
| 29 | NM_001077282 | <i>nedd9</i>     | neural precursor cell expressed, developmentally down-regulated 9          | 2.01 |                                               |                             |                                   |                   |     |
| 30 | NM_205670    | <i>tmem88a</i>   | transmembrane protein 88 a                                                 | 1.99 | ventral mesoderm <sup>13</sup>                |                             |                                   |                   |     |
| 31 | NM_001114437 | <i>brinp3a</i>   | bone morphogenetic protein/retinoic acid inducible neural-specific 3a      | 1.95 |                                               |                             |                                   |                   |     |
| 32 | NM_199534    | <i>zgc:65851</i> | zgc:65851                                                                  | 1.94 |                                               |                             |                                   |                   |     |
| 33 | NM_001008648 | <i>foxj1b</i>    | forkhead box J1b                                                           | 1.93 | otic vesicle, lateral mesoderm <sup>46</sup>  |                             |                                   |                   |     |
| 34 | NM_001014333 | <i>cdcp1a</i>    | CUB domain containing protein 1a                                           | 1.90 |                                               |                             |                                   |                   |     |
| 35 | NM_131166    | <i>hoxd10a</i>   | homeobox D10a                                                              | 1.90 | tailbud                                       | AP patterning <sup>40</sup> | AP patterning, myogenesis         |                   | Yes |
| 36 | NM_131690    | <i>atp1a1b</i>   | ATPase, Na+/K+ transporting, alpha 1b polypeptide (atp1a1b)                | 1.89 |                                               |                             |                                   |                   |     |
| 37 | NM_213118    | <i>sox2</i>      | SRY (sex determining region Y)-box 2                                       | 1.79 | neural plate, tailbud <sup>1</sup>            |                             | epithelial-mesenchymal transition |                   |     |
| 38 | NM_001001402 | <i>enc3</i>      | ectodermal-neural cortex 3                                                 | 1.79 | lateral mesoderm, tailbud <sup>27</sup>       | AP patterning <sup>47</sup> |                                   |                   |     |
| 39 | NM_001193651 | <i>ctnnd2b</i>   | catenin (cadherin-associated protein), delta 2b                            | 1.75 |                                               |                             |                                   |                   |     |
| 40 | NM_001006021 | <i>amt</i>       | aminomethyltransferase                                                     | 1.73 | yolk syncytial layer <sup>13</sup>            |                             |                                   |                   |     |
| 41 | NM_214816    | <i>tcf12</i>     | transcription factor 12                                                    | 1.72 | adaxial, lateral mesoderm                     |                             | myogenesis                        |                   | Yes |
| 42 | NM_131146    | <i>cyp26a1</i>   | cytochrome P450, family 26, subfamily A, polypeptide 1                     | 1.72 | tailbud, anterior region                      | AP patterning <sup>48</sup> | AP patterning, somitogenesis      |                   | Yes |
| 43 | NM_131126    | <i>hoxd9a</i>    | homeobox D9a                                                               | 1.71 | tailbud                                       | AP patterning <sup>40</sup> | AP patterning, myogenesis         |                   | Yes |
| 44 | NM_001077370 | <i>prkar2aa</i>  | protein kinase, cAMP-dependent, regulatory, type II, alpha A               | 1.70 |                                               |                             | epithelial-mesenchymal transition |                   |     |
| 45 | NM_131070    | <i>mdka</i>      | midkine a                                                                  | 1.69 | paraxial mesoderm <sup>49</sup>               |                             | epithelial-mesenchymal transition |                   |     |
| 46 | NM_001030074 | <i>kcnk6</i>     | potassium channel, subfamily K, member 6                                   | 1.67 | yolk syncytial layer, notochord <sup>13</sup> |                             |                                   |                   |     |
| 47 | NM_130971    | <i>lfng</i>      | LFNG O-fucosylpeptide 3-beta-N-acetylglucosaminyltransferase               | 1.64 | neural plate, neural tube <sup>13</sup>       |                             | somitogenesis                     |                   |     |
| 48 | NM_131541    | <i>hoxb10a</i>   | homeobox B10a                                                              | 1.64 | tailbud                                       | AP patterning <sup>40</sup> |                                   |                   | Yes |
| 49 | NM_200111    | <i>arhgap29b</i> | Rho GTPase activating protein 29b                                          | 1.62 | periderm, tailbud <sup>1</sup>                |                             |                                   |                   |     |
| 50 | NM_001030098 | <i>prickle1b</i> | prickle homolog 1b                                                         | 1.60 | tailbud, axial mesoderm <sup>9</sup>          | AP patterning <sup>50</sup> |                                   |                   |     |
| 51 | NM_131125    | <i>hoxd3a</i>    | homeobox D3a                                                               | 1.60 | tailbud                                       | AP patterning <sup>40</sup> | AP patterning                     |                   | Yes |
| 52 | NM_199643    | <i>coro2a</i>    | coronin, actin binding protein, 2A                                         | 1.58 | neural plate, epidermis <sup>13</sup>         |                             |                                   |                   |     |
| 53 | NM_131281    | <i>fgf8a</i>     | fibroblast growth factor 8a                                                | 1.58 | margin, tailbud <sup>1</sup>                  | somitogenesis <sup>51</sup> |                                   | Yes <sup>52</sup> |     |
| 54 | NM_194388    | <i>tuba1b</i>    | tubulin, alpha 1b                                                          | 1.54 | trigeminal placode <sup>1</sup>               |                             |                                   |                   |     |
| 55 | NM_199733    | <i>tsku</i>      | tsukushi small leucine rich proteoglycan homolog ( <i>Xenopus laevis</i> ) | 1.54 | margin, tailbud <sup>14</sup>                 |                             |                                   |                   |     |
| 56 | NM_001190982 | <i>tuba1a</i>    | tubulin, alpha 1a                                                          | 1.54 | ubiquitous <sup>13</sup>                      |                             |                                   |                   |     |
| 57 | NM_001242996 | <i>mthfd1l</i>   | methylenetetrahydrofolate dehydrogenase (NADP+ dependent) 1-like           | 1.54 |                                               |                             |                                   |                   |     |
| 58 | NM_001077153 | <i>zfp361a</i>   | zinc finger protein 36, C3H type-like 1a                                   | 1.52 | optic primordium,                             |                             |                                   |                   |     |

|    |           |               |                               |      |                      |  |  |  |  |
|----|-----------|---------------|-------------------------------|------|----------------------|--|--|--|--|
|    |           |               |                               |      | tailbud <sup>1</sup> |  |  |  |  |
| 59 | NM_213634 | <i>ptgdsb</i> | prostaglandin D2 synthase b   | 1.52 |                      |  |  |  |  |
| 60 | NM_199980 | <i>itm2cb</i> | integral membrane protein 2Cb | 1.50 |                      |  |  |  |  |



**Supplementary Table 3. Phenotypic statistics (in order of presentation)**

| Figure  | Micrograph                               | Phenotypic criteria                                | Total number of embryos | Number with phenotype | % Penetrance |
|---------|------------------------------------------|----------------------------------------------------|-------------------------|-----------------------|--------------|
| Fig. 1b | <i>tbx16</i> cMO –UV                     | Trunk somites present; normal tailbud              | 12                      | 12                    | 100          |
| Fig. 1b | <i>tbx16</i> cMO +UV                     | Loss of trunk somites; enlarged tailbud            | 13                      | 13                    | 100          |
| Fig. 1e | cFD only                                 | Ventral progenitors become trunk somites           | 19                      | 19                    | 100          |
| Fig. 1e | cFD + <i>tbx16</i> cMO                   | Ventral progenitors located posteriorly            | 20                      | 19                    | 95           |
| Fig. 3a | <i>hoxa9b</i> (8 hpf), WT                | Expression in ventrolateral margin                 | 11                      | 0                     | 0            |
| Fig. 3a | <i>hoxa9b</i> (8 hpf), <i>tbx16</i> MO   | Expression in ventrolateral margin                 | 11                      | 5                     | 45           |
| Fig. 3a | <i>hoxa9b</i> (10 hpf), WT               | Weak expression in tailbud                         | 7                       | 7                     | 100          |
| Fig. 3a | <i>hoxa9b</i> (10 hpf), <i>tbx16</i> MO  | Strong expression in tailbud                       | 6                       | 6                     | 100          |
| Fig. 3a | <i>hoxa9b</i> (13 hpf), WT               | Strong expression in tailbud and paraxial mesoderm | 7                       | 7                     | 100          |
| Fig. 3a | <i>hoxa9b</i> (13 hpf), <i>tbx16</i> MO  | Strong expression in tailbud and paraxial mesoderm | 6                       | 6                     | 100          |
| Fig. 3a | <i>hoxa10b</i> (8 hpf), WT               | Expression in ventrolateral margin                 | 13                      | 0                     | 0            |
| Fig. 3a | <i>hoxa10b</i> (8 hpf), <i>tbx16</i> MO  | Expression in ventrolateral margin                 | 11                      | 0                     | 0            |
| Fig. 3a | <i>hoxa10b</i> (10 hpf), WT              | Expression in tailbud                              | 7                       | 0                     | 0            |
| Fig. 3a | <i>hoxa10b</i> (10 hpf), <i>tbx16</i> MO | Expression in tailbud                              | 7                       | 7                     | 100          |
| Fig. 3a | <i>hoxa10b</i> (13 hpf), WT              | Expression in tailbud and paraxial mesoderm        | 7                       | 7                     | 100          |
| Fig. 3a | <i>hoxa10b</i> (13 hpf), <i>tbx16</i> MO | Strong expression in tailbud and paraxial mesoderm | 7                       | 7                     | 100          |
| Fig. 3a | <i>hoxa13b</i> (8 hpf), WT               | Expression in ventrolateral margin                 | 10                      | 0                     | 0            |
| Fig. 3a | <i>hoxa13b</i> (8 hpf), <i>tbx16</i> MO  | Expression in ventrolateral margin                 | 11                      | 10                    | 91           |
| Fig. 3a | <i>hoxa13b</i> (10 hpf), WT              | Expression in tailbud                              | 15                      | 0                     | 0            |
| Fig. 3a | <i>hoxa13b</i> (10 hpf), <i>tbx16</i> MO | Expression in tailbud                              | 12                      | 11                    | 92           |
| Fig. 3a | <i>hoxa13b</i> (13 hpf), WT              | Weak expression in tailbud                         | 16                      | 15                    | 94           |
| Fig. 3a | <i>hoxa13b</i> (13 hpf), <i>tbx16</i> MO | Strong expression in tailbud                       | 13                      | 13                    | 100          |
| Fig. 3a | <i>hoxb6a</i> (8 hpf), WT                | Expression in ventrolateral margin                 | 13                      | 9                     | 69           |
| Fig. 3a | <i>hoxb6a</i> (8 hpf), <i>tbx16</i> MO   | Expression in ventrolateral margin                 | 10                      | 9                     | 90           |
| Fig. 3a | <i>hoxb6a</i> (10 hpf), WT               | Expression in tailbud                              | 18                      | 18                    | 100          |
| Fig. 3a | <i>hoxb6a</i> (10 hpf), <i>tbx16</i> MO  | Expression in tailbud                              | 13                      | 13                    | 100          |
| Fig. 3a | <i>hoxb6a</i> (13 hpf), WT               | Expression in tailbud and paraxial mesoderm        | 14                      | 14                    | 100          |
| Fig. 3a | <i>hoxb6a</i> (13 hpf), <i>tbx16</i> MO  | Expression in tailbud and paraxial mesoderm        | 12                      | 12                    | 100          |
| Fig. 3a | <i>hoxb10a</i> (8 hpf), WT               | Expression in ventrolateral margin                 | 10                      | 4                     | 40           |
| Fig. 3a | <i>hoxb10a</i> (8 hpf), <i>tbx16</i> MO  | Expression in ventrolateral margin                 | 8                       | 6                     | 75           |
| Fig. 3a | <i>hoxb10a</i> (10 hpf), WT              | Expression in tailbud                              | 7                       | 7                     | 100          |
| Fig. 3a | <i>hoxb10a</i> (10 hpf), <i>tbx16</i> MO | Elevated expression in tailbud                     | 6                       | 6                     | 100          |
| Fig. 3a | <i>hoxb10a</i> (13 hpf), WT              | Expression in tailbud and paraxial mesoderm        | 8                       | 8                     | 100          |
| Fig. 3a | <i>hoxb10a</i> (13 hpf), <i>tbx16</i> MO | Expression in tailbud and paraxial mesoderm        | 6                       | 6                     | 100          |
| Fig. 3a | <i>hoxc10a</i> (8 hpf), WT               | Expression in ventrolateral margin                 | 10                      | 1                     | 10           |
| Fig. 3a | <i>hoxc10a</i> (8 hpf), <i>tbx16</i> MO  | Expression in ventrolateral margin                 | 11                      | 8                     | 73           |
| Fig. 3a | <i>hoxc10a</i> (10 hpf), WT              | Expression in tailbud                              | 14                      | 0                     | 0            |
| Fig. 3a | <i>hoxc10a</i> (10 hpf), <i>tbx16</i> MO | Expression in tailbud                              | 11                      | 11                    | 100          |
| Fig. 3a | <i>hoxc10a</i> (13 hpf), WT              | Expression in tailbud                              | 15                      | 15                    | 100          |
| Fig. 3a | <i>hoxc10a</i> (13 hpf), <i>tbx16</i> MO | Expression in tailbud and paraxial mesoderm        | 13                      | 13                    | 100          |
| Fig. 3a | <i>hoxd9a</i> (8 hpf), WT                | Expression in ventrolateral margin                 | 8                       | 0                     | 0            |
| Fig. 3a | <i>hoxd9a</i> (8 hpf), <i>tbx16</i> MO   | Expression in ventrolateral margin                 | 10                      | 0                     | 0            |
| Fig. 3a | <i>hoxd9a</i> (10 hpf), WT               | Expression in tailbud                              | 13                      | 0                     | 0            |
| Fig. 3a | <i>hoxd9a</i> (10 hpf), <i>tbx16</i> MO  | Expression in tailbud                              | 13                      | 12                    | 92           |
| Fig. 3a | <i>hoxd9a</i> (13 hpf), WT               | Expression in tailbud                              | 15                      | 15                    | 100          |
| Fig. 3a | <i>hoxd9a</i> (13 hpf), <i>tbx16</i> MO  | Expression in tailbud                              | 13                      | 13                    | 100          |
| Fig. 3a | <i>hoxd10a</i> (8 hpf), WT               | Expression in ventrolateral margin                 | 11                      | 0                     | 0            |
| Fig. 3a | <i>hoxd10a</i> (8 hpf), <i>tbx16</i> MO  | Expression in ventrolateral margin                 | 8                       | 1                     | 13           |

|               |                                          |                                                                                                           |    |    |     |
|---------------|------------------------------------------|-----------------------------------------------------------------------------------------------------------|----|----|-----|
| Fig. 3a       | <i>hoxd10a</i> (10 hpf), WT              | Expression in tailbud                                                                                     | 14 | 0  | 0   |
| Fig. 3a       | <i>hoxd10a</i> (10 hpf), <i>tbx16</i> MO | Expression in tailbud                                                                                     | 13 | 11 | 85  |
| Fig. 3a       | <i>hoxd10a</i> (13 hpf), WT              | Expression in tailbud                                                                                     | 14 | 14 | 100 |
| Fig. 3a       | <i>hoxd10a</i> (13 hpf), <i>tbx16</i> MO | Expression in tailbud                                                                                     | 15 | 15 | 100 |
| Fig. 4a       | cFD only                                 | Upregulation of <i>hoxa9b</i> in irradiated cells                                                         | 16 | 1  | 6   |
| Fig. 4a       | cFD + <i>tbx16</i> cMO                   | Upregulation of <i>hoxa9b</i> in irradiated cells and flanking tissues                                    | 12 | 10 | 83  |
| Fig. 4b       | <i>bmp2a</i> , WT                        | No detectable expression                                                                                  | 34 | 30 | 88  |
| Fig. 4b       | <i>bmp2a</i> , <i>tbx16</i> MO           | Expression in ventrolateral margin                                                                        | 26 | 25 | 96  |
| Fig. 4b       | <i>fsta</i> , WT                         | Strong expression in anterior mesoderm                                                                    | 35 | 32 | 91  |
| Fig. 4b       | <i>fsta</i> , <i>tbx16</i> MO            | Reduced expression in anterior mesoderm                                                                   | 28 | 28 | 100 |
| Fig. 4c       | 0 $\mu$ M dorsomorphin                   | Precocious expression of <i>hoxa13b</i>                                                                   | 14 | 14 | 100 |
| Fig. 4c       | 10 $\mu$ M dorsomorphin                  | Precocious expression of <i>hoxa13b</i> , slightly weaker                                                 | 12 | 12 | 100 |
| Fig. 4c       | 25 $\mu$ M dorsomorphin                  | Precocious expression of <i>hoxa13b</i> , faint                                                           | 13 | 3  | 23  |
| Fig. 4c       | 50 $\mu$ M dorsomorphin                  | Precocious expression of <i>hoxa13b</i>                                                                   | 14 | 0  | 0   |
| Fig. 5b       | <i>mCherry-NLS</i>                       | EGFP observed in trunk somites                                                                            | 36 | 26 | 72  |
| Fig. 5b       | <i>hoxa13b</i>                           | EGFP observed in trunk somites                                                                            | 26 | 0  | 0   |
| Fig. 5b       | <i>hoxa13b</i> mutant                    | EGFP observed in trunk somites                                                                            | 33 | 23 | 70  |
| Supp. Fig. 7a | <i>mshg1</i> , WT                        | Strong expression in tailbud                                                                              | 5  | 5  | 100 |
| Supp. Fig. 7a | <i>mshg1</i> , <i>tbx16</i> MO           | Reduced expression in tailbud                                                                             | 5  | 5  | 100 |
| Supp. Fig. 7a | <i>tbx6l</i> , WT                        | Strong expression in tailbud                                                                              | 18 | 18 | 100 |
| Supp. Fig. 7a | <i>tbx6l</i> , <i>tbx16</i> MO           | Reduced expression in tailbud                                                                             | 13 | 13 | 100 |
| Supp. Fig. 7a | <i>fzd10</i> , WT                        | Strong expression in tailbud                                                                              | 20 | 20 | 100 |
| Supp. Fig. 7a | <i>fzd10</i> , <i>tbx16</i> MO           | Reduced expression in tailbud                                                                             | 15 | 13 | 87  |
| Supp. Fig. 7a | <i>rem1</i> , WT                         | Strong expression in tailbud and paraxial mesoderm                                                        | 18 | 18 | 100 |
| Supp. Fig. 7a | <i>rem1</i> , <i>tbx16</i> MO            | Reduced expression in tailbud and paraxial mesoderm                                                       | 15 | 15 | 100 |
| Supp. Fig. 7a | <i>atp2a2a</i> , WT                      | Strong expression in tailbud and head                                                                     | 18 | 18 | 100 |
| Supp. Fig. 7a | <i>atp2a2a</i> , <i>tbx16</i> MO         | Reduced expression in tailbud and head                                                                    | 15 | 15 | 100 |
| Supp. Fig. 7b | <i>adam8a</i> , WT                       | Expression in tailbud                                                                                     | 18 | 18 | 100 |
| Supp. Fig. 7b | <i>adam8a</i> , <i>tbx16</i> MO          | Elevated expression in tailbud                                                                            | 15 | 13 | 87  |
| Supp. Fig. 7b | <i>bmp2a</i> , WT                        | Weak expression in tailbud                                                                                | 15 | 15 | 100 |
| Supp. Fig. 7b | <i>bmp2a</i> , <i>tbx16</i> MO           | Strong expression in tailbud                                                                              | 12 | 12 | 100 |
| Supp. Fig. 7b | <i>hivp2a</i> , WT                       | Weak expression in tailbud                                                                                | 18 | 18 | 100 |
| Supp. Fig. 7b | <i>hivp2a</i> , <i>tbx16</i> MO          | Strong expression in tailbud                                                                              | 15 | 13 | 87  |
| Supp. Fig. 7b | <i>s1pr1</i> , WT                        | No detectable expression in tailbud                                                                       | 19 | 19 | 100 |
| Supp. Fig. 7b | <i>s1pr1</i> , <i>tbx16</i> MO           | Expression in tailbud                                                                                     | 15 | 15 | 100 |
| Supp. Fig. 7b | <i>tagln3b</i> , WT                      | Expression in tailbud                                                                                     | 20 | 20 | 100 |
| Supp. Fig. 7b | <i>tagln3b</i> , <i>tbx16</i> MO         | Elevated expression in tailbud                                                                            | 15 | 14 | 93  |
| Supp. Fig. 7b | <i>hoxd3a</i> , WT                       | Expression in tailbud                                                                                     | 14 | 14 | 100 |
| Supp. Fig. 7b | <i>hoxd3a</i> , <i>tbx16</i> MO          | Elevated expression in tailbud                                                                            | 12 | 12 | 100 |
| Supp. Fig. 7b | <i>cyp26a1</i> , WT                      | Expression in tailbud and anterior mesoderm                                                               | 19 | 19 | 100 |
| Supp. Fig. 7b | <i>cyp26a1</i> , <i>tbx16</i> MO         | Elevated expression in tailbud and anterior mesoderm                                                      | 16 | 14 | 88  |
| Supp. Fig. 7b | <i>tcf12</i> , WT                        | Expression in anterior, paraxial mesoderm                                                                 | 18 | 18 | 100 |
| Supp. Fig. 7b | <i>tcf12</i> , <i>tbx16</i> MO           | Increased expression in tailbud and anterior mesoderm; loss of expression in adaxial and lateral mesoderm | 13 | 11 | 85  |
| Supp. Fig. 8  | <i>actc1a</i> , WT                       | Adaxial expression                                                                                        | 21 | 21 | 100 |
| Supp. Fig. 8  | <i>actc1a</i> , <i>tbx16</i> MO          | Loss of adaxial expression                                                                                | 14 | 12 | 86  |
| Supp. Fig. 8  | <i>cxcl12a</i> , WT                      | Paraxial expression                                                                                       | 5  | 5  | 100 |
| Supp. Fig. 8  | <i>cxcl12a</i> , <i>tbx16</i> MO         | Loss of paraxial expression                                                                               | 5  | 5  | 100 |
| Supp. Fig. 8  | <i>foxc1b</i> , WT                       | Adaxial and tailbud expression                                                                            | 5  | 5  | 100 |
| Supp. Fig. 8  | <i>foxc1b</i> , <i>tbx16</i> MO          | Reduced adaxial and tailbud expression                                                                    | 5  | 5  | 100 |
| Supp. Fig. 8  | <i>fsta</i> , WT                         | Anterior paraxial mesoderm expression                                                                     | 20 | 20 | 100 |
| Supp. Fig. 8  | <i>fsta</i> , <i>tbx16</i> MO            | Reduced anterior paraxial mesoderm expression                                                             | 15 | 15 | 100 |
| Supp. Fig. 8  | <i>mespab</i> , WT                       | Expression in forming somite                                                                              | 19 | 19 | 100 |
| Supp. Fig. 8  | <i>mespab</i> , <i>tbx16</i> MO          | Loss of expression in forming somite; some adaxial expression                                             | 12 | 12 | 100 |

|                |                                  |                                                                                                                       |    |    |     |
|----------------|----------------------------------|-----------------------------------------------------------------------------------------------------------------------|----|----|-----|
| Supp. Fig. 8   | <i>notch2</i> , WT               | Axial and paraxial mesoderm expression                                                                                | 20 | 20 | 100 |
| Supp. Fig. 8   | <i>notch2</i> , <i>tbx16</i> MO  | Reduced axial and loss of paraxial mesoderm expression                                                                | 15 | 15 | 100 |
| Supp. Fig. 8   | <i>pcdh10b</i> , WT              | Paraxial mesoderm expression                                                                                          | 5  | 5  | 100 |
| Supp. Fig. 8   | <i>pcdh10b</i> , <i>tbx16</i> MO | Loss of paraxial mesoderm expression; ectopic expression in axial domain                                              | 5  | 5  | 100 |
| Supp. Fig. 8   | <i>rippy2</i> , WT               | Expression in forming somite                                                                                          | 19 | 19 | 100 |
| Supp. Fig. 8   | <i>rippy2</i> , <i>tbx16</i> MO  | No detectable expression                                                                                              | 14 | 14 | 100 |
| Supp. Fig. 8   | <i>aplnra</i> , WT               | Expression in adaxial mesoderm and anterior region                                                                    | 19 | 19 | 100 |
| Supp. Fig. 8   | <i>aplnra</i> , <i>tbx16</i> MO  | Loss of expression in adaxial mesoderm; expression maintained anteriorly                                              | 15 | 15 | 100 |
| Supp. Fig. 8   | <i>aplnrb</i> , WT               | Adaxial, lateral, and tailbud mesoderm expression                                                                     | 20 | 20 | 100 |
| Supp. Fig. 8   | <i>aplnrb</i> , <i>tbx16</i> MO  | Loss of expression in adaxial, lateral mesoderm; elevated expression in tailbud                                       | 14 | 14 | 100 |
| Supp. Fig. 8   | <i>fzd7b</i> , WT                | Expression in paraxial mesoderm and anterior region                                                                   | 20 | 20 | 100 |
| Supp. Fig. 8   | <i>fzd7b</i> , <i>tbx16</i> MO   | Loss of expression in paraxial mesoderm; expression maintained in anterior region; ectopic expression in axial domain | 11 | 10 | 91  |
| Supp. Fig. 8   | <i>her11</i> , WT                | Cyclic expression in paraxial mesoderm; expression in anterior structures.                                            | 18 | 18 | 100 |
| Supp. Fig. 8   | <i>her11</i> , <i>tbx16</i> MO   | Loss of paraxial expression; expression maintained in anterior structures.                                            | 15 | 15 | 100 |
| Supp. Fig. 8   | <i>meis1</i> , WT                | Expression in paraxial mesoderm and anterior structures                                                               | 20 | 20 | 100 |
| Supp. Fig. 8   | <i>meis1</i> , <i>tbx16</i> MO   | Loss of expression in paraxial mesoderm; expression maintained in anterior structures                                 | 15 | 15 | 100 |
| Supp. Fig. 9   | <i>hoxa9b</i>                    | No detectable expression                                                                                              | 34 | 9  | 26  |
| Supp. Fig. 9   | <i>hoxa9b</i>                    | Weak expression in ventral margin                                                                                     | 34 | 17 | 50  |
| Supp. Fig. 9   | <i>hoxa9b</i>                    | Strong expression in ventrolateral margin                                                                             | 34 | 8  | 24  |
| Supp. Fig. 9   | <i>hoxa13b</i>                   | No detectable expression                                                                                              | 34 | 25 | 73  |
| Supp. Fig. 9   | <i>hoxa13b</i>                   | Expression in ventral margin                                                                                          | 34 | 9  | 26  |
| Supp. Fig. 9   | <i>hoxb10a</i>                   | Weak expression in germ ring                                                                                          | 33 | 7  | 21  |
| Supp. Fig. 9   | <i>hoxb10a</i>                   | Strong expression in germ ring                                                                                        | 33 | 27 | 79  |
| Supp. Fig. 9   | <i>hoxc10a</i>                   | No detectable expression                                                                                              | 33 | 8  | 24  |
| Supp. Fig. 9   | <i>hoxc10a</i>                   | Expression in ventrolateral margin                                                                                    | 33 | 25 | 76  |
| Supp. Fig. 10  | <i>hoxa10b</i> , WT              | Expression in mesodermal and neural tissues                                                                           | 7  | 7  | 100 |
| Supp. Fig. 10  | <i>hoxa10b</i> , <i>tbx16</i> MO | Expression pattern disrupted in mesodermal tissues but maintained in neural tissues                                   | 6  | 6  | 100 |
| Supp. Fig. 10  | <i>hoxb10a</i> , WT              | Expression in mesodermal and neural tissues                                                                           | 7  | 7  | 100 |
| Supp. Fig. 10  | <i>hoxb10a</i> , <i>tbx16</i> MO | Expression pattern disrupted in mesodermal tissues but maintained in neural tissues                                   | 6  | 6  | 100 |
| Supp. Fig. 10  | <i>hoxc10a</i> , WT              | Expression in mesodermal and neural tissues                                                                           | 13 | 13 | 100 |
| Supp. Fig. 10  | <i>hoxc10a</i> , <i>tbx16</i> MO | Expression pattern disrupted in mesodermal tissues but maintained in neural tissues                                   | 12 | 12 | 100 |
| Supp. Fig. 10  | <i>hoxd10a</i> , WT              | Expression in mesodermal and neural tissues                                                                           | 15 | 15 | 100 |
| Supp. Fig. 10  | <i>hoxd10a</i> , <i>tbx16</i> MO | Expression pattern disrupted in mesodermal tissues but maintained in neural tissues                                   | 10 | 10 | 100 |
| Supp. Fig. 11  | <i>bmp2a</i>                     | No detectable expression                                                                                              | 34 | 8  | 24  |
| Supp. Fig. 11  | <i>bmp2a</i>                     | Expression in the entire germ ring, including the dorsal margin                                                       | 34 | 18 | 53  |
| Supp. Fig. 11  | <i>bmp2a</i>                     | Expression in ventrolateral margin                                                                                    | 34 | 8  | 24  |
| Supp. Fig. 11  | <i>fsta</i>                      | Strong expression in anterior mesoderm                                                                                | 32 | 24 | 75  |
| Supp. Fig. 11  | <i>fsta</i>                      | Reduced expression in anterior mesoderm                                                                               | 32 | 8  | 25  |
| Supp. Fig. 11  | <i>bmp2a</i> + <i>fsta</i>       | No <i>bmp2a</i> expression and strong <i>fsta</i> expression                                                          | 34 | 8  | 24  |
| Supp. Fig. 11  | <i>bmp2a</i> + <i>fsta</i>       | <i>bmp2</i> expression in entire germ ring and strong <i>fsta</i> expression                                          | 34 | 19 | 56  |
| Supp. Fig. 11  | <i>bmp2a</i> + <i>fsta</i>       | <i>bmp2</i> expression in ventrolateral margin and reduced <i>fsta</i> expression                                     | 34 | 7  | 21  |
| Supp. Fig. 14b | EGFP only                        | EGFP-positive cells with Tbx16 expression                                                                             | 3  | 3  | 100 |
| Supp. Fig. 14b | <i>hoxa13b</i>                   | EGFP-positive cells with Tbx16 expression; aggregation of EGFP-positive cells                                         | 3  | 3  | 100 |
| Supp. Fig. 14b | <i>hoxa13b</i> mutant            | EGFP-positive cells with Tbx16 expression                                                                             | 3  | 3  | 100 |

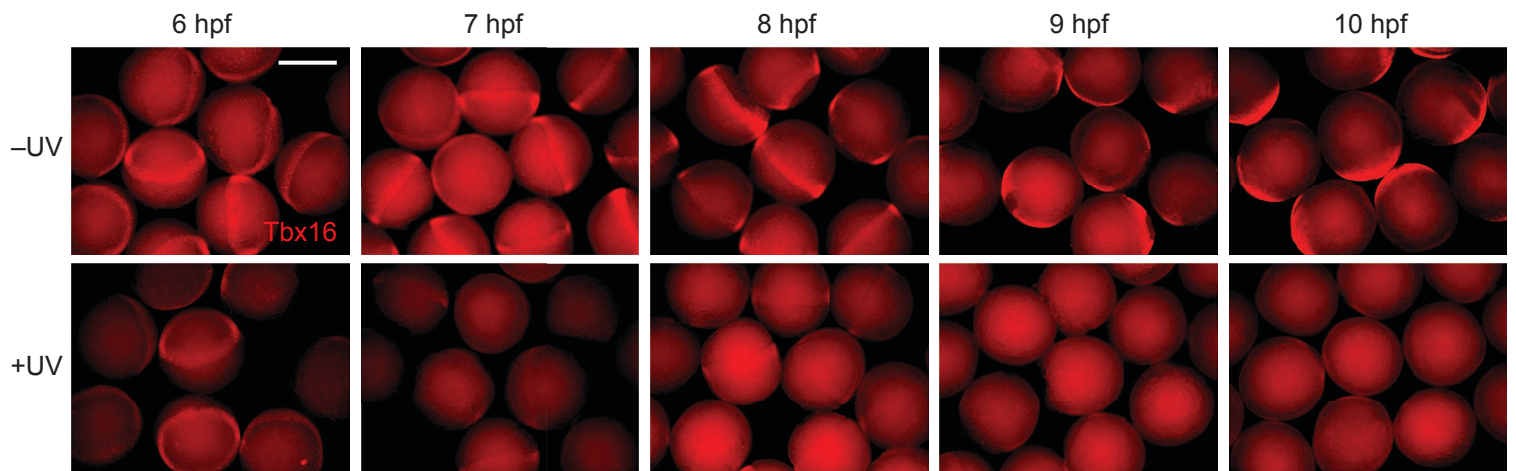

**Supplementary Figure 1. Tbx16 protein turnover after global *tbx16* cMO photoactivation.** Whole-mount immunostaining of Tbx16 protein in embryos injected with the *tbx16* cMO at the 1- to 4-cell stage and either cultured in the dark (-UV) or globally irradiated at 6 hpf (+UV). Tbx16 levels at the designated time points are shown, demonstrating maximum protein knockdown within 2-3 hours after cMO photoactivation. Scale bar: 500  $\mu$ m.

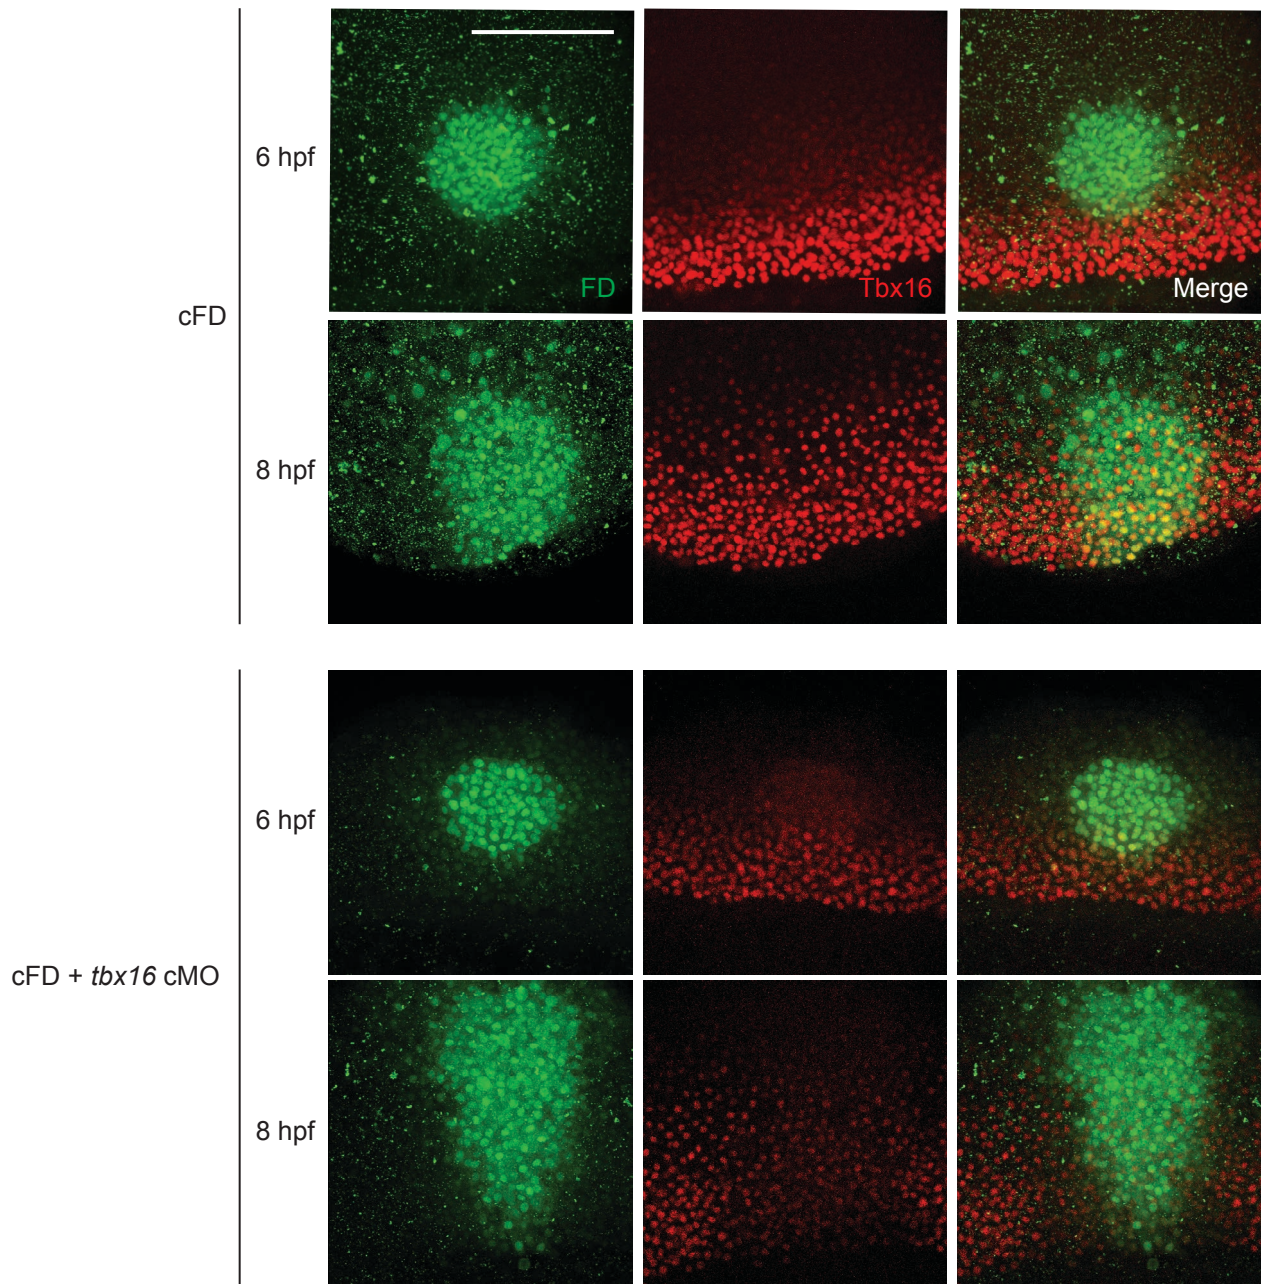

**Supplementary Figure 2. Optochemical suppression of Tbx16 expression in ventral margin-derived MPCs.** Co-immunostaining of FD (green) and Tbx16 protein (red) in embryos injected with cFD or a cFD/*tbx16* cMO mixture and then region-specifically irradiated within the ventral margin at 6 hpf. Tbx16 protein levels are significantly reduced in the optically targeted MPCs of cFD/*tbx16* cMO-injected embryos at 8 hpf, whereas Tbx16 expression is unaffected in equivalently irradiated cFD-injected embryos. Embryo orientations: ventral view, animal pole up. Scale bar: 100  $\mu$ m.

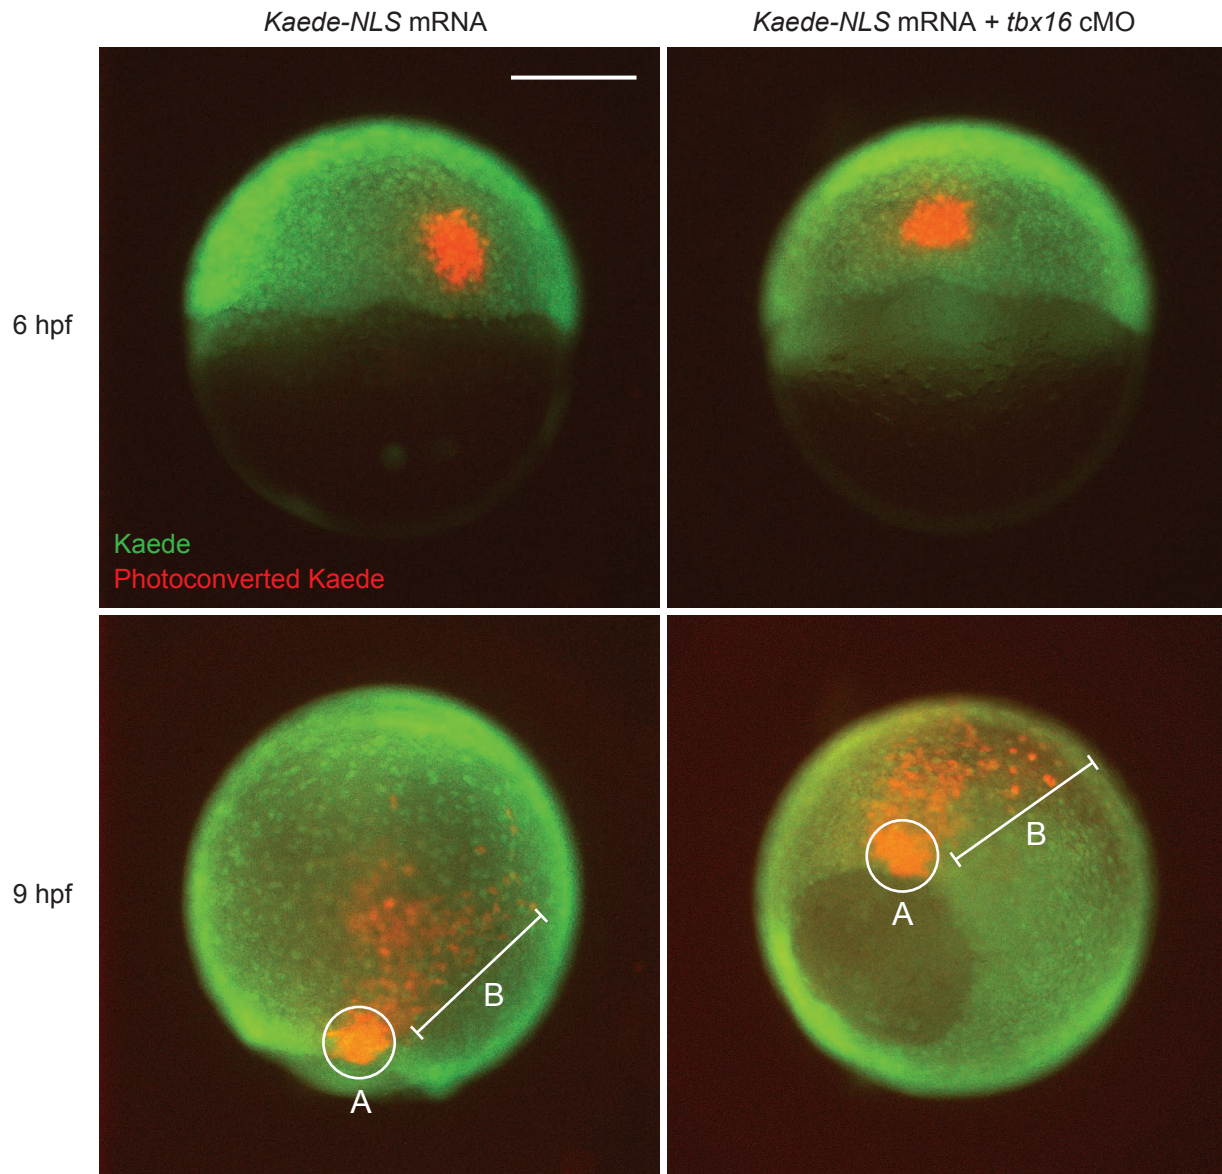

**Supplementary Figure 3. *Tbx16* knockdown does not alter the movement of ventral margin-derived cells during gastrulation.** Zebrafish zygotes were injected with *Kaede-NLS* mRNA alone or in combination with the *tbx16* cMO and then spot-irradiated in the ventral margin at 6 hpf. Micrographs of representative embryos at 6 and 9 hpf are shown, revealing two cell populations with distinct migratory behaviors: A, epiblast cells that move directly to the margin; B, hypoblast cells that migrate toward the animal pole. Neither population exhibited *Tbx16*-dependent movements during this developmental phase. Embryo orientations: ventral view, animal pole up. Scale bar: 200  $\mu$ m. The depicted embryos are identical to those shown in Supplementary Figures 4 and 5, and complete time-lapse videos of these cell movements during gastrulation (6 to 9 hpf) are available as Supplementary Movie 1.

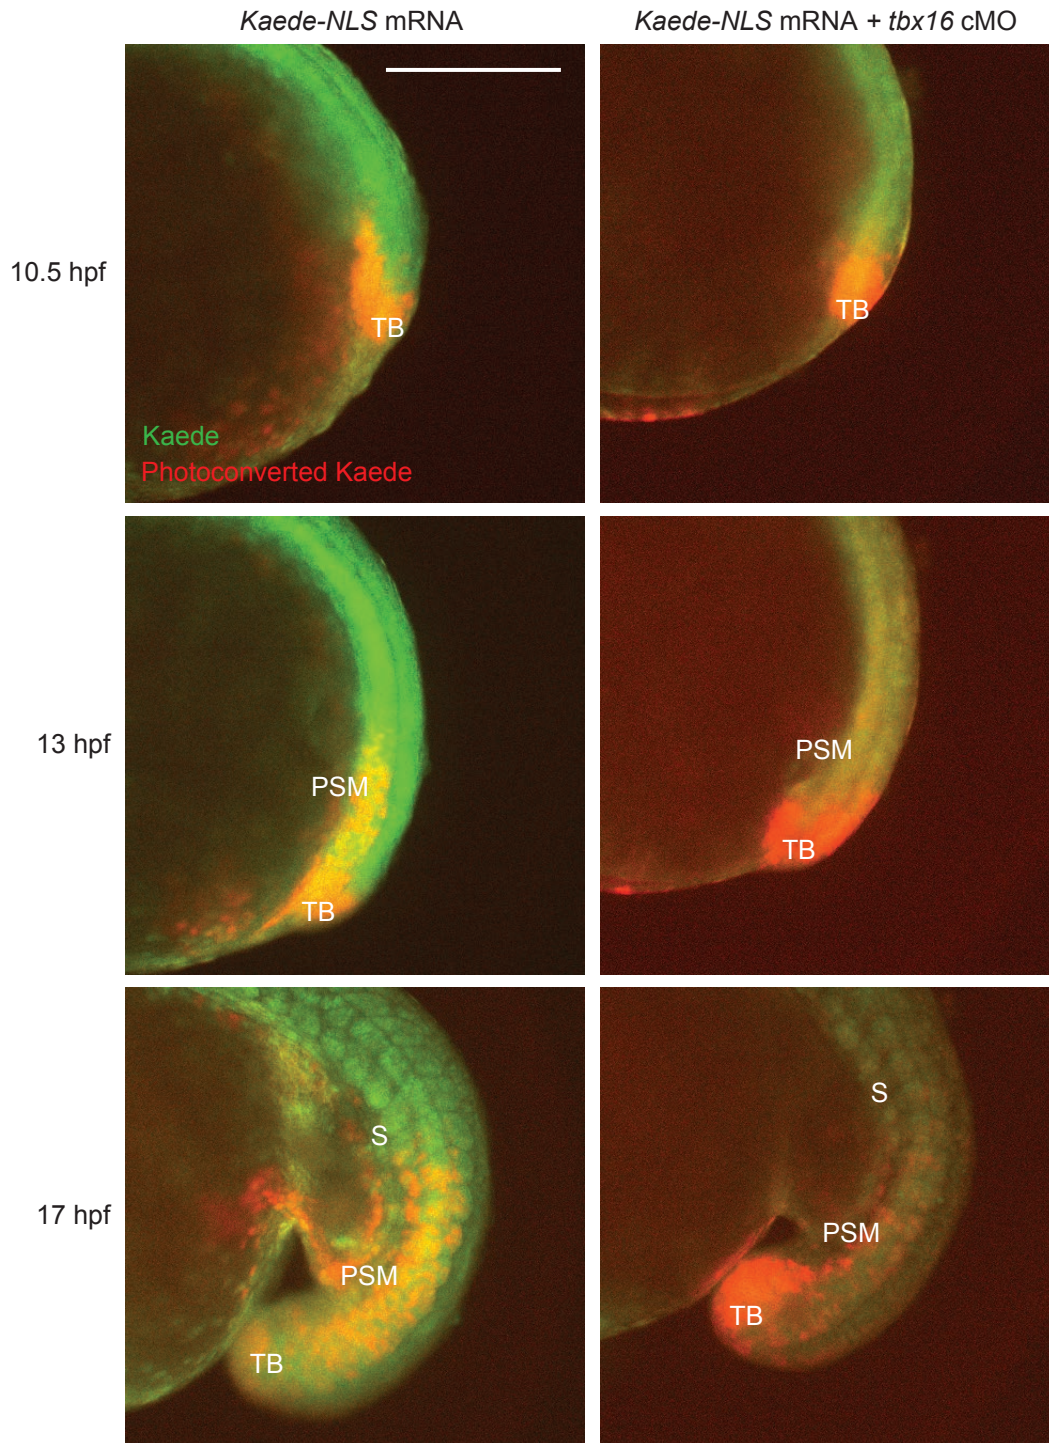

**Supplementary Figure 4. *Tbx16* knockdown inhibits egression of ventral margin-derived cells from the tailbud during early somitogenesis.** Zebrafish zygotes were injected with *Kaede-NLS* mRNA alone or in combination with the *tbx16* cMO and then spot-irradiated in the ventral margin at 6 hpf. Micrographs of representative embryos at 10.5, 13, and 17 hpf are shown, demonstrating the *Tbx16*-dependent migration of ventral margin-derived MPCs from the tailbud into the presomitic mesoderm. Tailbud (TB), presomitic mesoderm (PSM), and somitic (S) tissues are labeled. Embryo orientations: lateral view, dorsal up, posterior right. Scale bar: 200  $\mu$ m. The depicted embryos are identical to those shown in Supplementary Figures 3 and 5, and complete time-lapse videos of these cell movements during early somitogenesis (10.5 to 17 hpf) are available as Supplementary Movie 2.

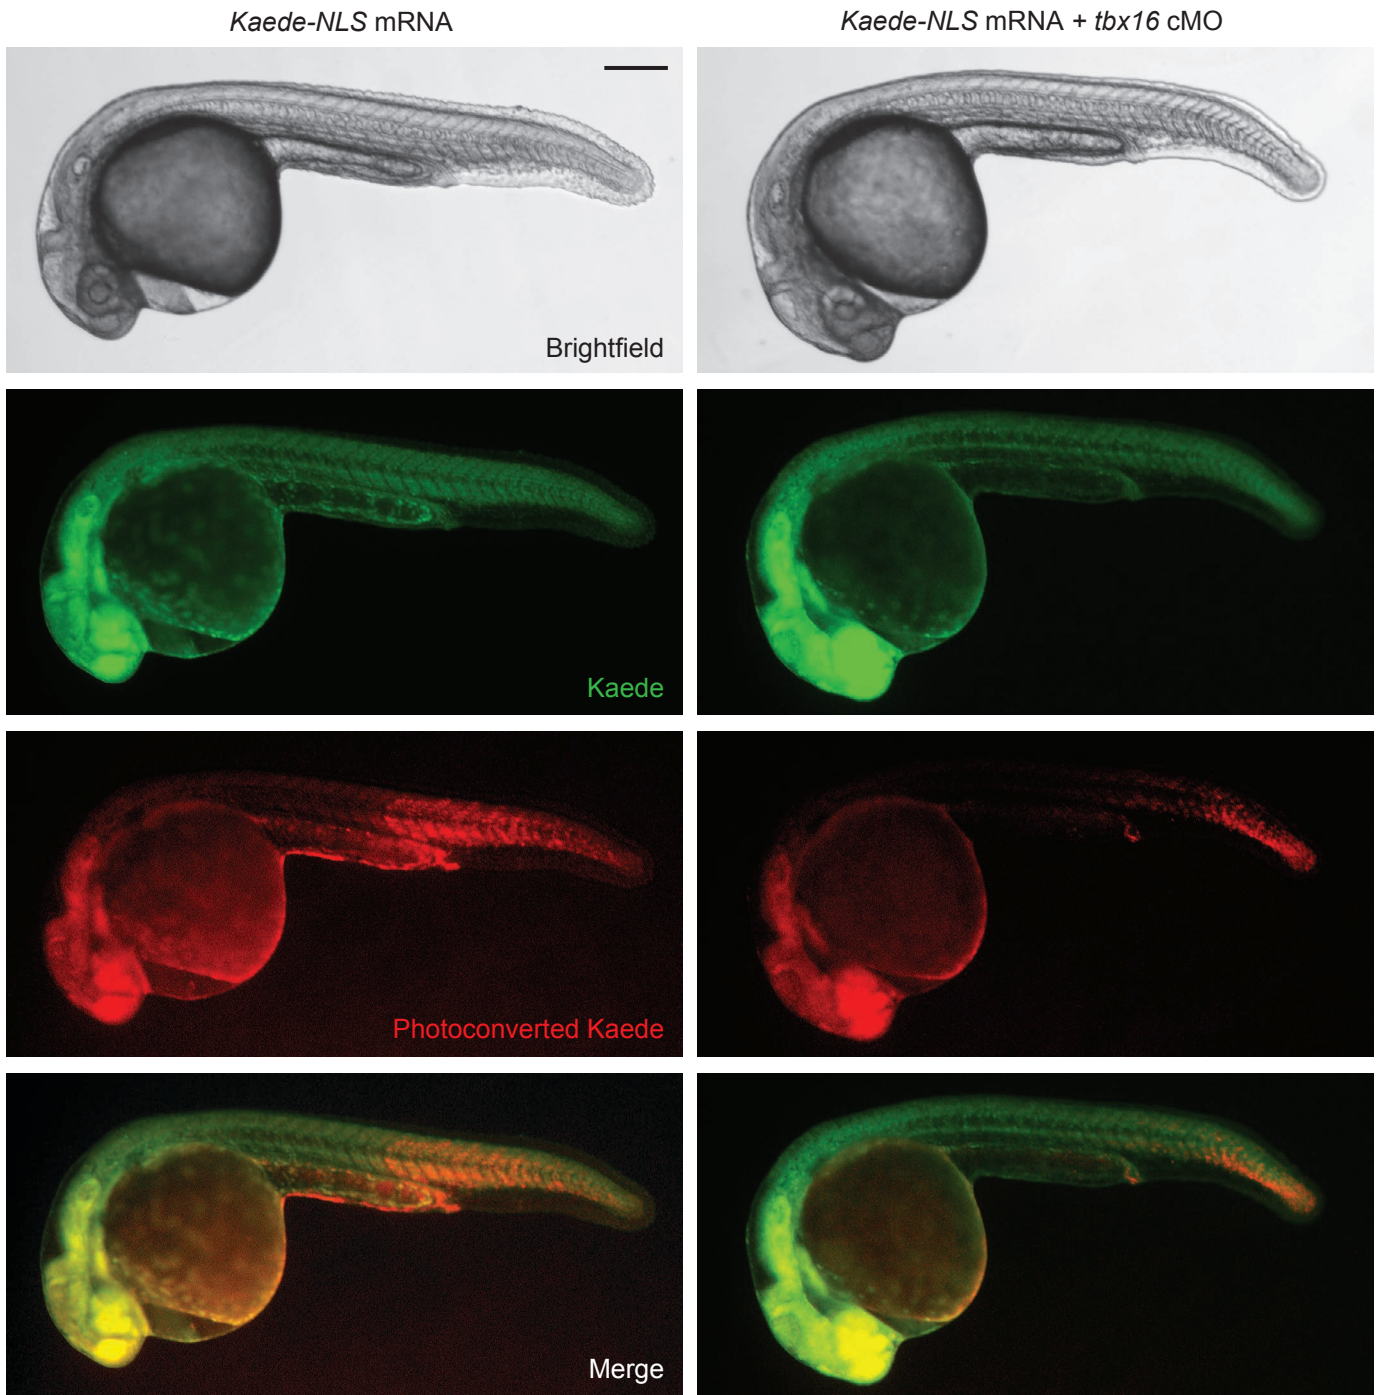

**Supplementary Figure 5. Somite phenotypes associated with localized Tbx16 knockdown in ventral margin-derived cells.** Zebrafish zygotes were injected with *Kaede-NLS* mRNA alone or in combination with the *tbx16* cMO and then spot-irradiated in the ventral margin at 6 hpf. Micrographs of representative embryos at 24 hpf are shown, demonstrating the Tbx16-dependent differentiation of ventral margin-derived MPCs into trunk somitic muscle. Note that localized Tbx16 knockdown does not cause significant changes in gross morphology. Embryo orientations: lateral view, anterior left. Scale bar: 200  $\mu$ m. The depicted embryos are identical to those shown in Supplementary Figures 3 and 4.



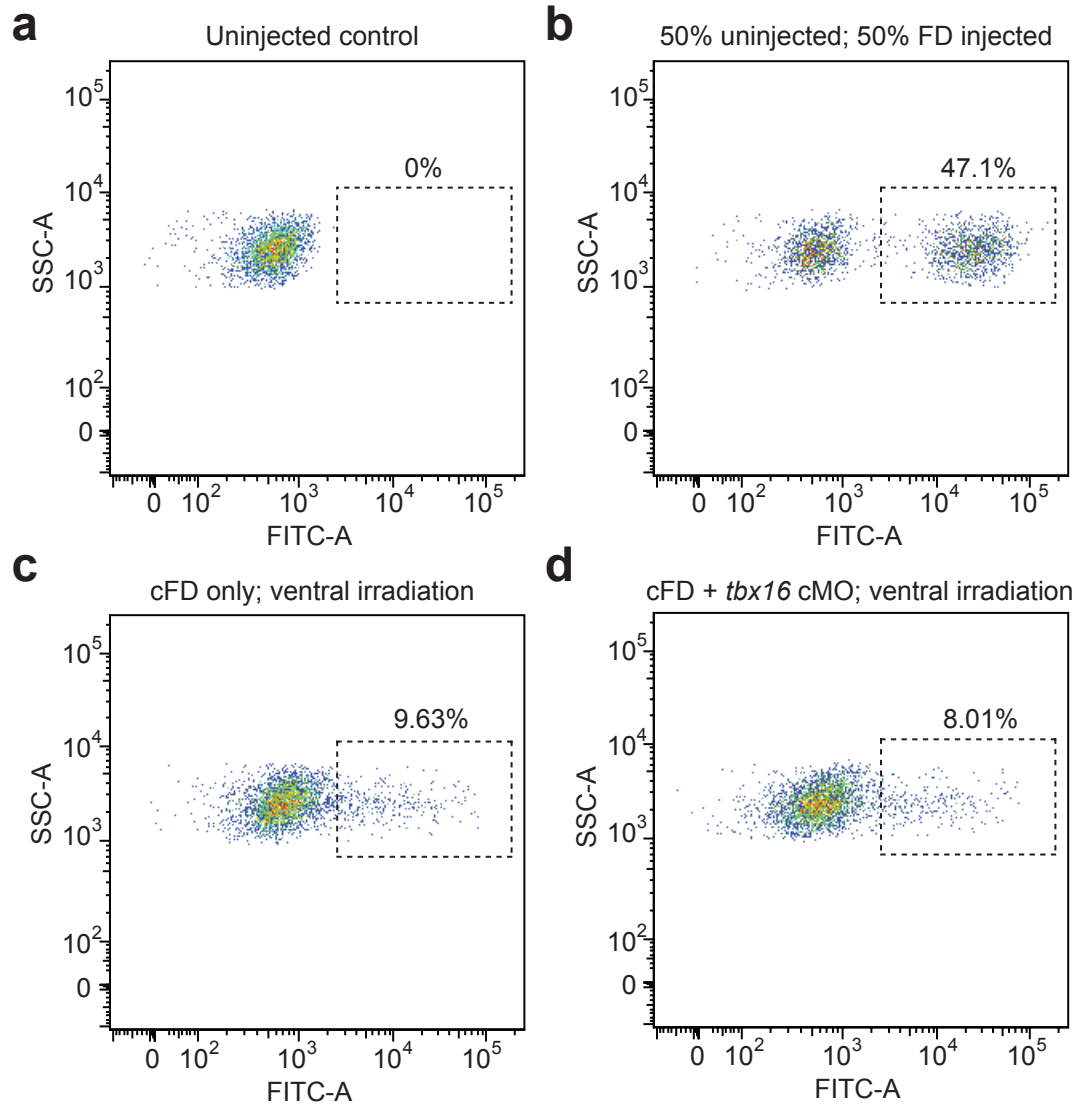

**Supplementary Figure 6. Purification of irradiated ventral margin-derived cells by flow cytometry.** Representative log-scale FACS plots obtained from embryos injected with cFD or a cFD/*tbx16* cMO mixture, spot-irradiated in the ventral margin, cultured until 9 hpf, and then dissociated into single cells. Fluorescence intensity (FITC-A: Ex: 488 nm, Em: 530 nm) and side-scatter area (SSC-A) measurements are shown for the following conditions: (a) uninjected embryos, (b) 1:1 ratio of uninjected embryos and FD-injected embryos; (c) spot-irradiated embryos injected with cFD alone, and (d) spot-irradiated embryos injected with a cFD/*tbx16* cMO mixture. The percentage of total cells within the sorting gate (dashed lines) for each condition is shown.

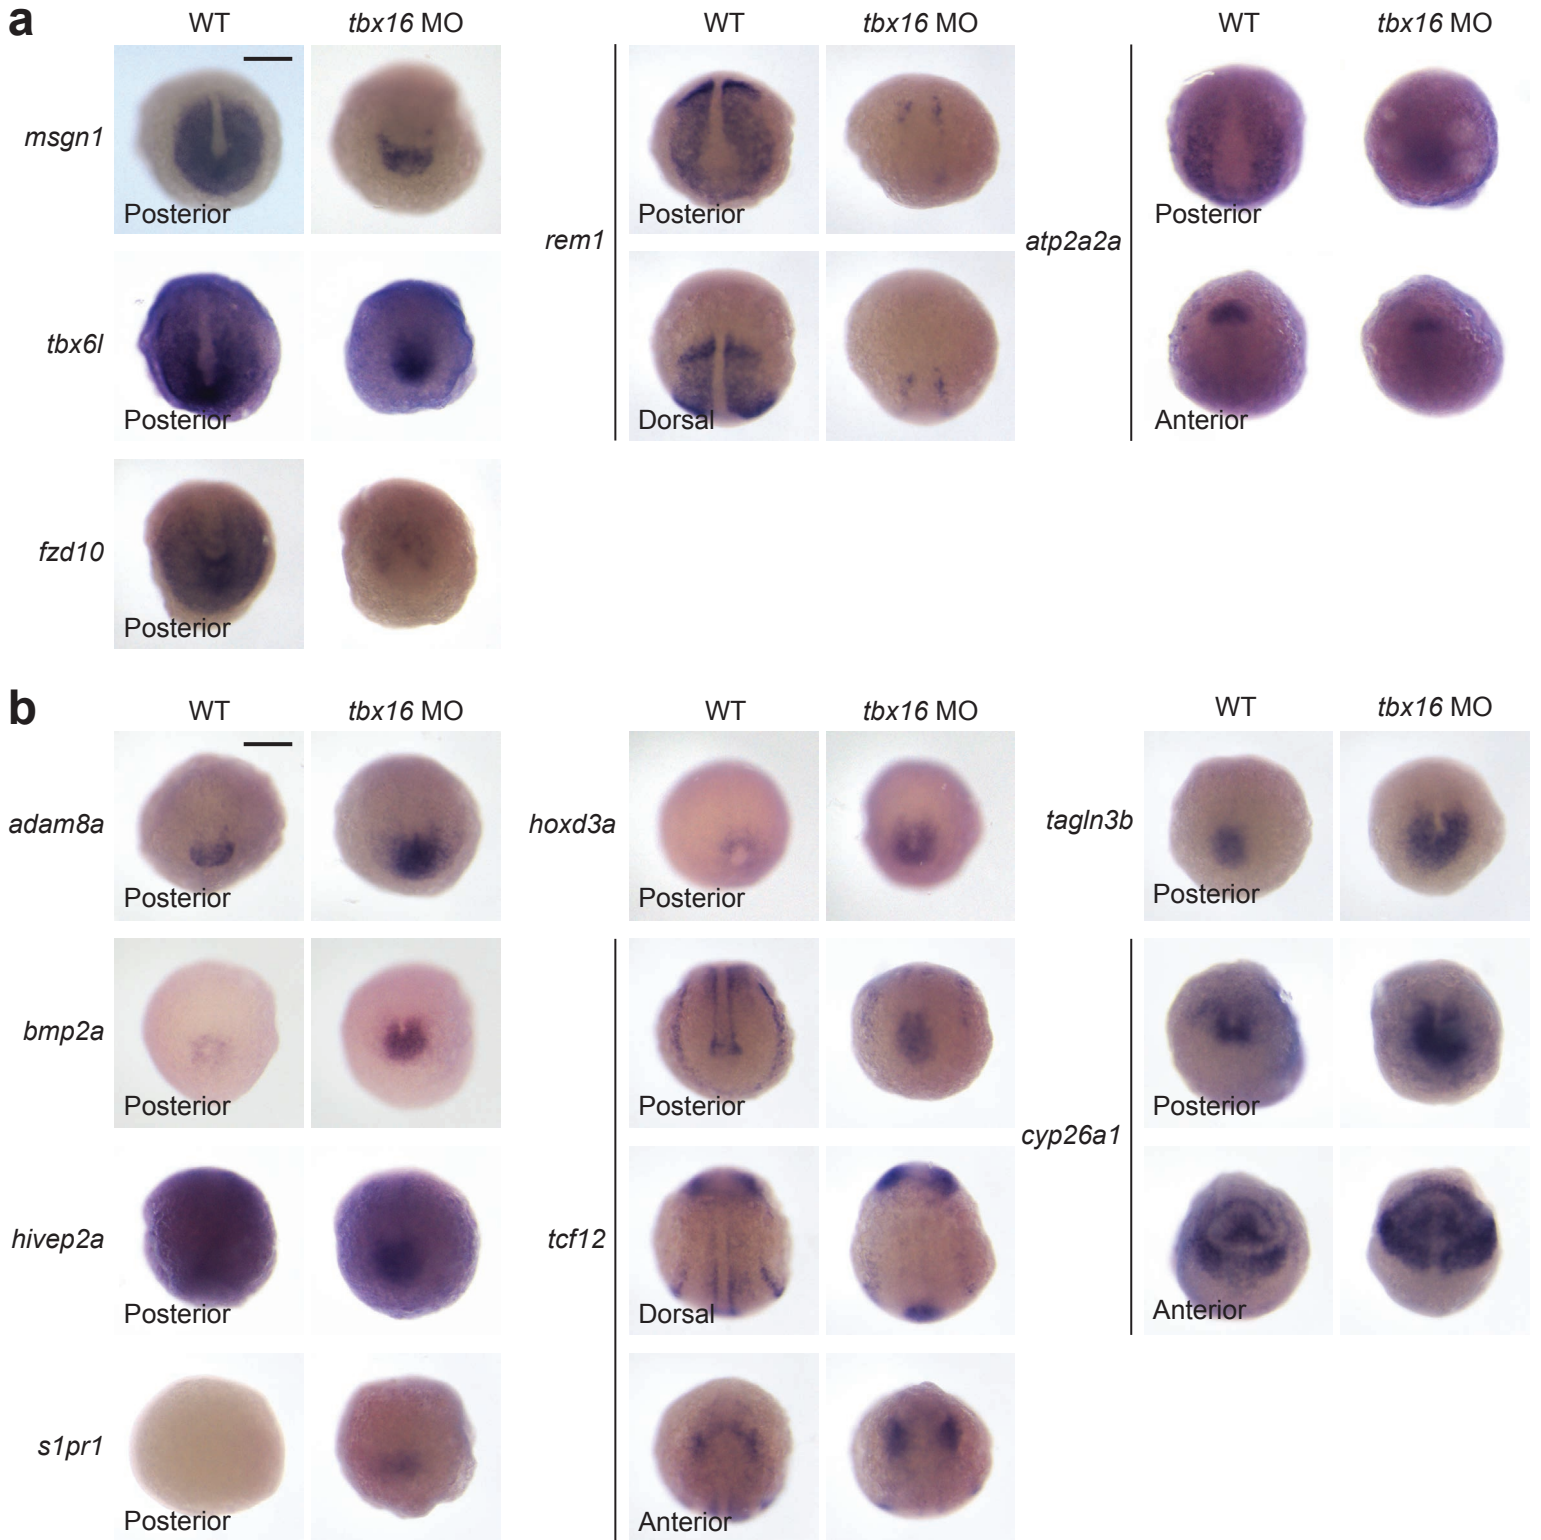

**Supplementary Figure 7. Validation of selected Tbx16-dependent genes that are expressed in the tailbud.** Analysis of candidate Tbx16 targets in wild type and *tbx16* morphant embryos by *in situ* hybridization. Genes that are downregulated (a) and upregulated (b) in *tbx16* morphants at 10-hpf are shown. Embryo orientations: posterior view, dorsal up; dorsal view, anterior up; or anterior view, dorsal down. Scale bar: 200  $\mu$ m.

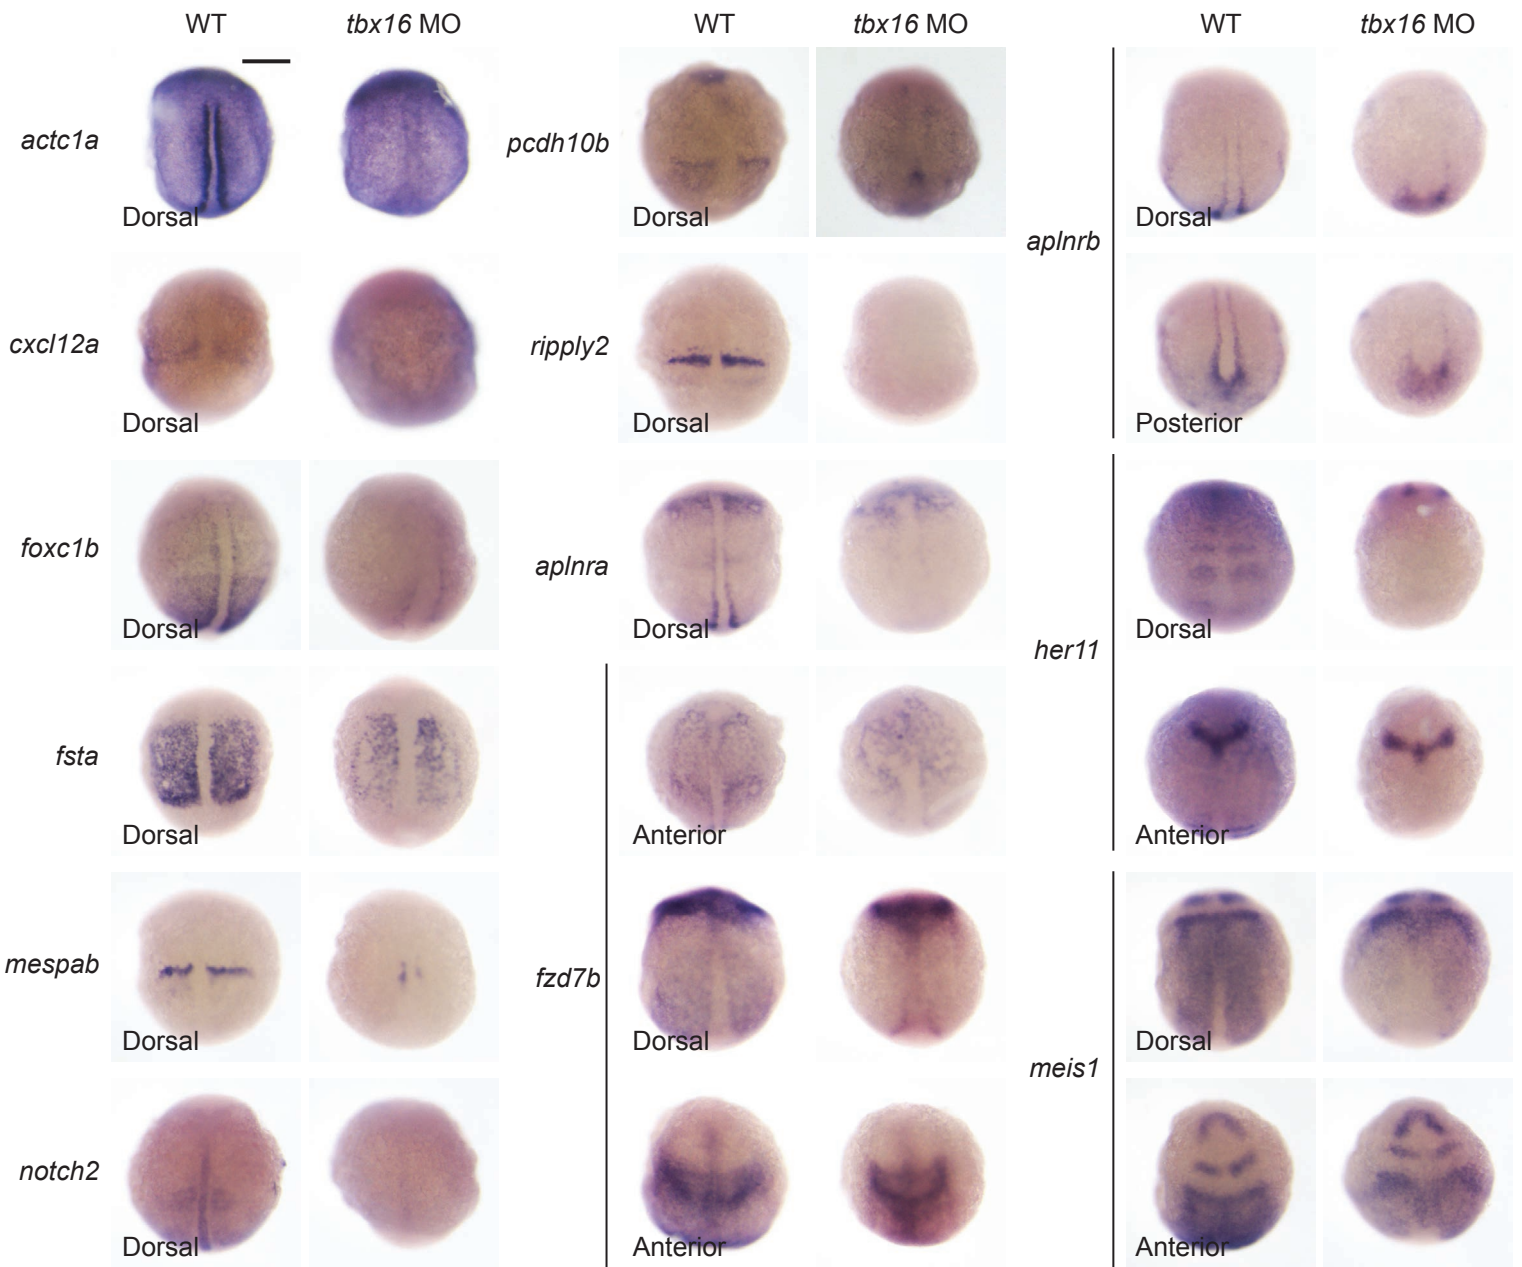

**Supplementary Figure 8. Validation of selected Tbx16-dependent genes that are expressed in paraxial or adaxial mesoderm.** Analysis of candidate Tbx16 targets in wild type and *tbx16* morphant embryos by *in situ* hybridization. Genes that are downregulated in *tbx16* morphants at 10 hpf are shown. Embryo orientations: posterior view, dorsal up; dorsal view, anterior up; or anterior view, dorsal down. Scale bar: 200  $\mu$ m.

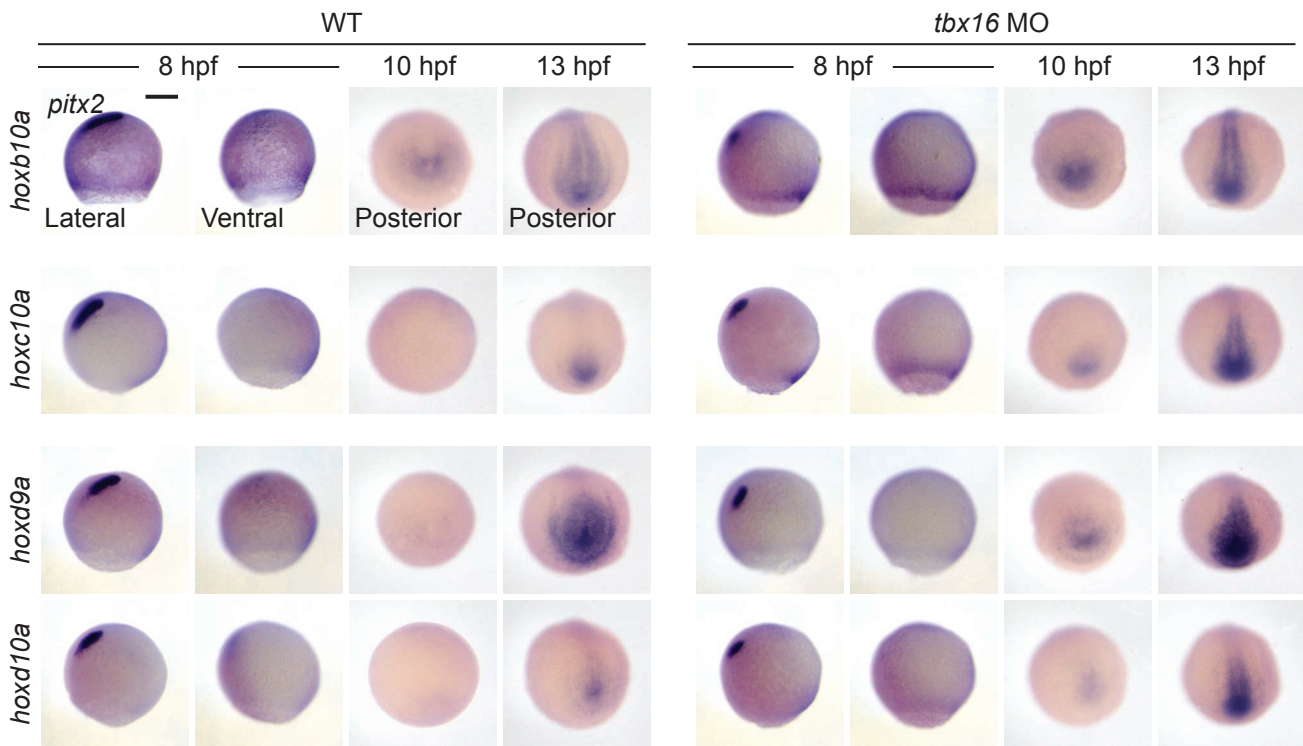

**Supplementary Figure 9. Tbx16 regulates *hox* gene activation during gastrulation.** (a) *hox* gene expression in wild type and *tbx16* morphant embryos during mid-gastrulation (8 hpf), tailbud formation (10 hpf), and early somitogenesis (13 hpf) as determined by *in situ* hybridization. Representative posterior *hox* genes identified in our transcriptome-wide survey for Tbx16 targets are shown. *pitx2* expression in the prechordal mesoderm was used as a dorsal marker. Embryo orientations: lateral view, dorsal left; ventral view, anterior up; and posterior view, dorsal up. Scale bar: 200  $\mu$ m.

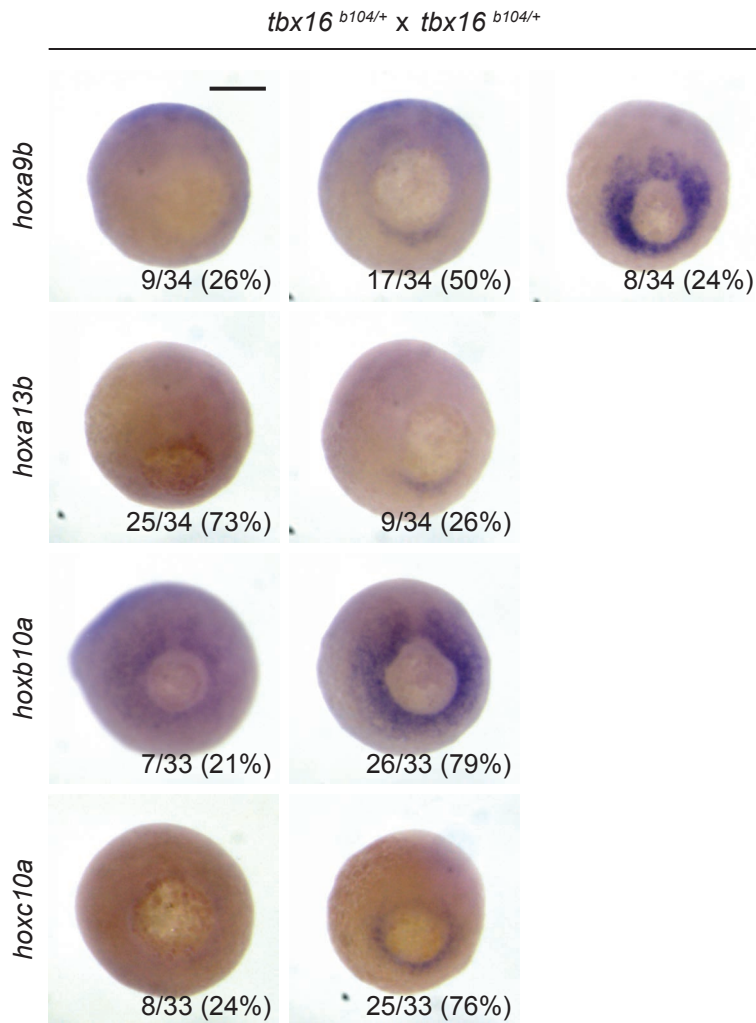

**Supplementary Figure 10. Genetic loss of *tbx16* function upregulates posterior *hox* gene expression.** Posterior *hox* gene expression patterns in progeny obtained by incrossing *tbx16* mutant heterozygotes. 9-hpf embryos are shown, and their phenotypic distributions reveal that wild type *tbx16* can be haploinsufficient with respect to its regulation of certain transcripts. Embryo orientations: posterior view, dorsal up. Scale bar: 200  $\mu$ m.

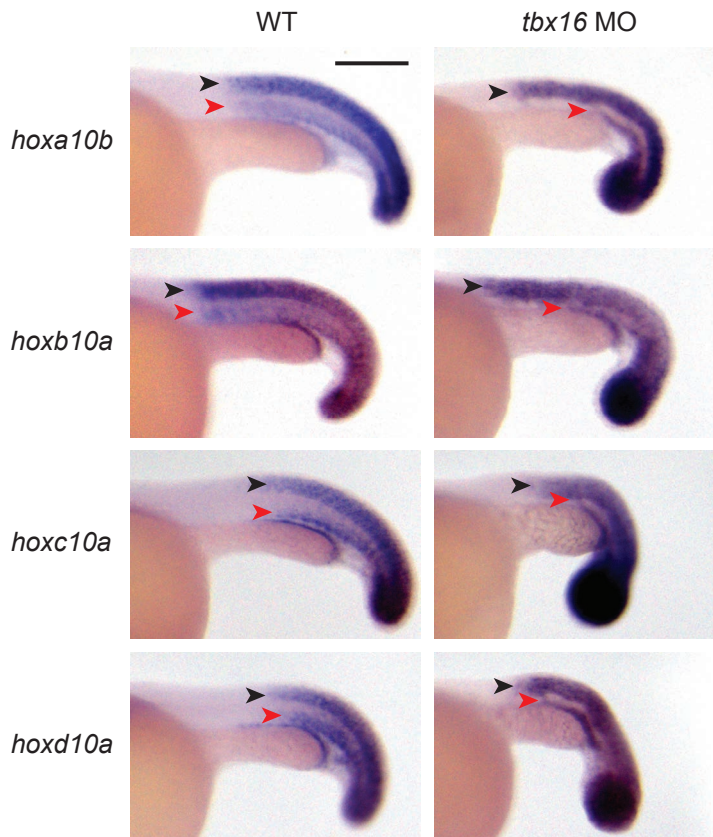

**Supplementary Figure 11. Tbx16 regulates mesodermal but not neural *hox* gene activation.** Comparison of posterior *hox* gene expression in wild type and *tbx16* morphant embryos by *in situ* hybridization. Expression patterns of selected group 10 paralogs in 24-hpf embryos are shown, and the anterior limits of neural and mesodermal transcription are labeled with black and red arrowheads, respectively. Embryo orientations: lateral view, anterior left. Scale bar: 200  $\mu$ m.

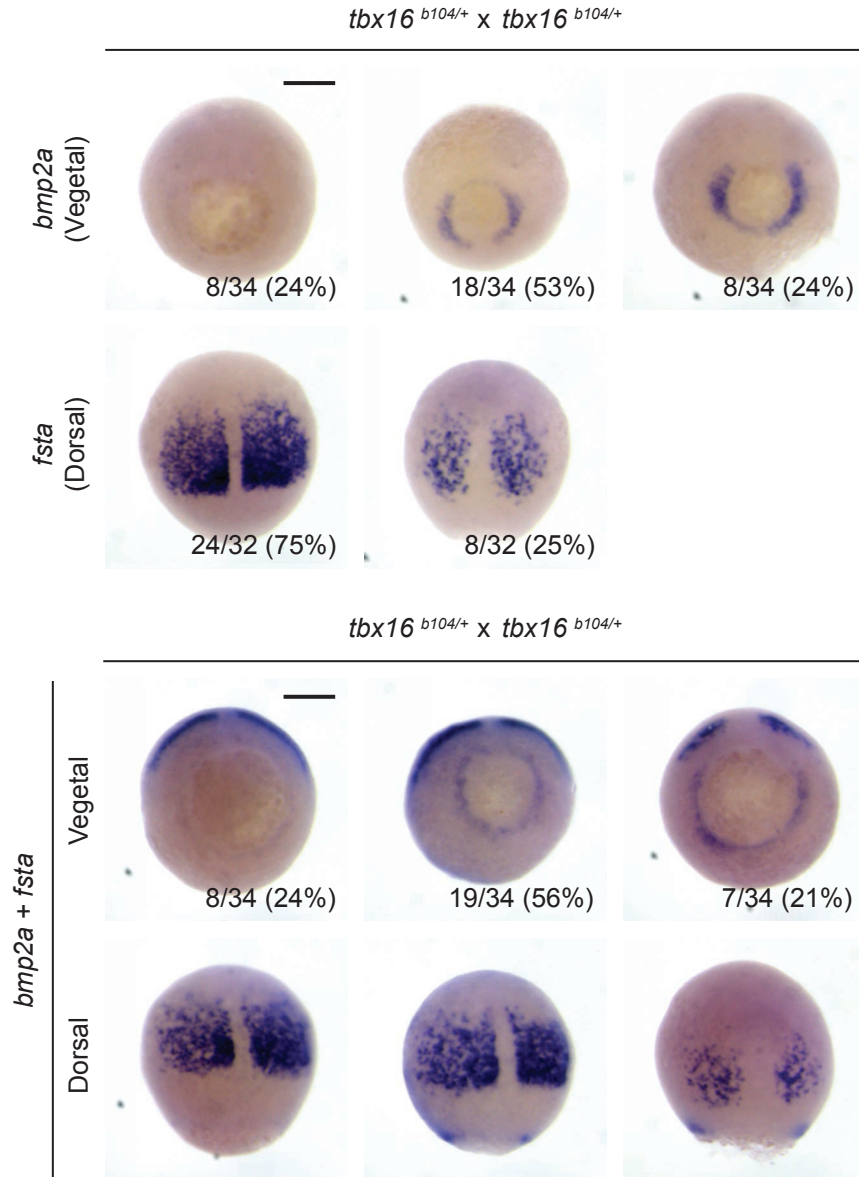

**Supplementary Figure 12. Genetic loss of *tbx16* function upregulates BMP signaling.** Expression of *bmp2a* and/or *fsta* in progeny obtained by incrossing *tbx16* mutant heterozygotes. 8-hpf embryos are shown, and their phenotypic distributions reveal that wild type *tbx16* is haploinsufficient with respect to *bmp2a* suppression. Embryo orientations: vegetal pole view, dorsal up; or dorsal view, animal pole up. Scale bars: 200  $\mu$ m.

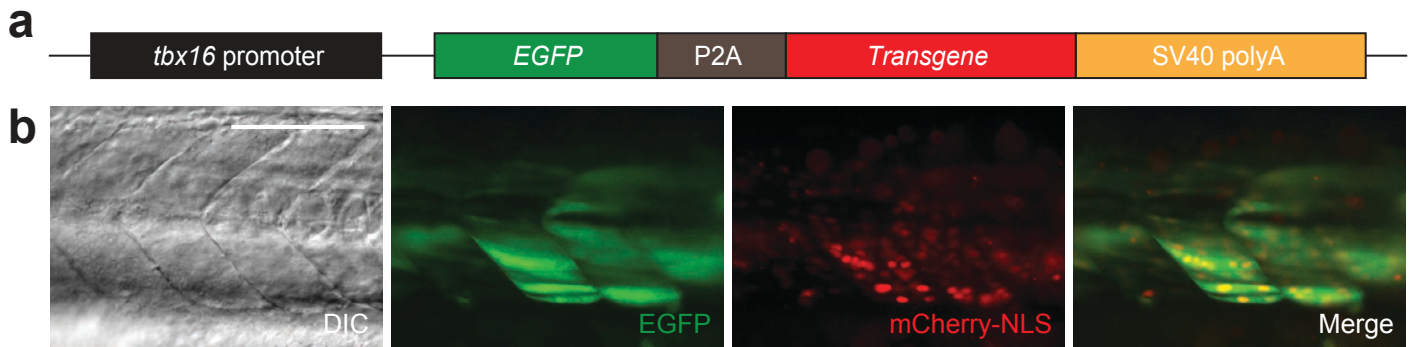

**Supplementary Figure 13. Bicistronic expression of a *tbx16*:EGFP-P2A-transgene construct.** (a) Construct used for MPC-targeted bicistronic expression of transgenes and an EGFP reporter. (b) Brightfield and fluorescence micrographs of zebrafish embryos injected with a pDestTol2-*tbx16*:EGFP-P2A-*mCherry-NLS* plasmid at the one-cell stage. The mosaic expression of cytoplasmic EGFP and nuclear mCherry-NLS in trunk somite cells at 24 hpf confirms mesoderm-specific expression and high-efficiency P2A linker “cleavage” via ribosomal skipping. Embryo orientations: lateral view, anterior left. Scale bar: 100  $\mu$ m.



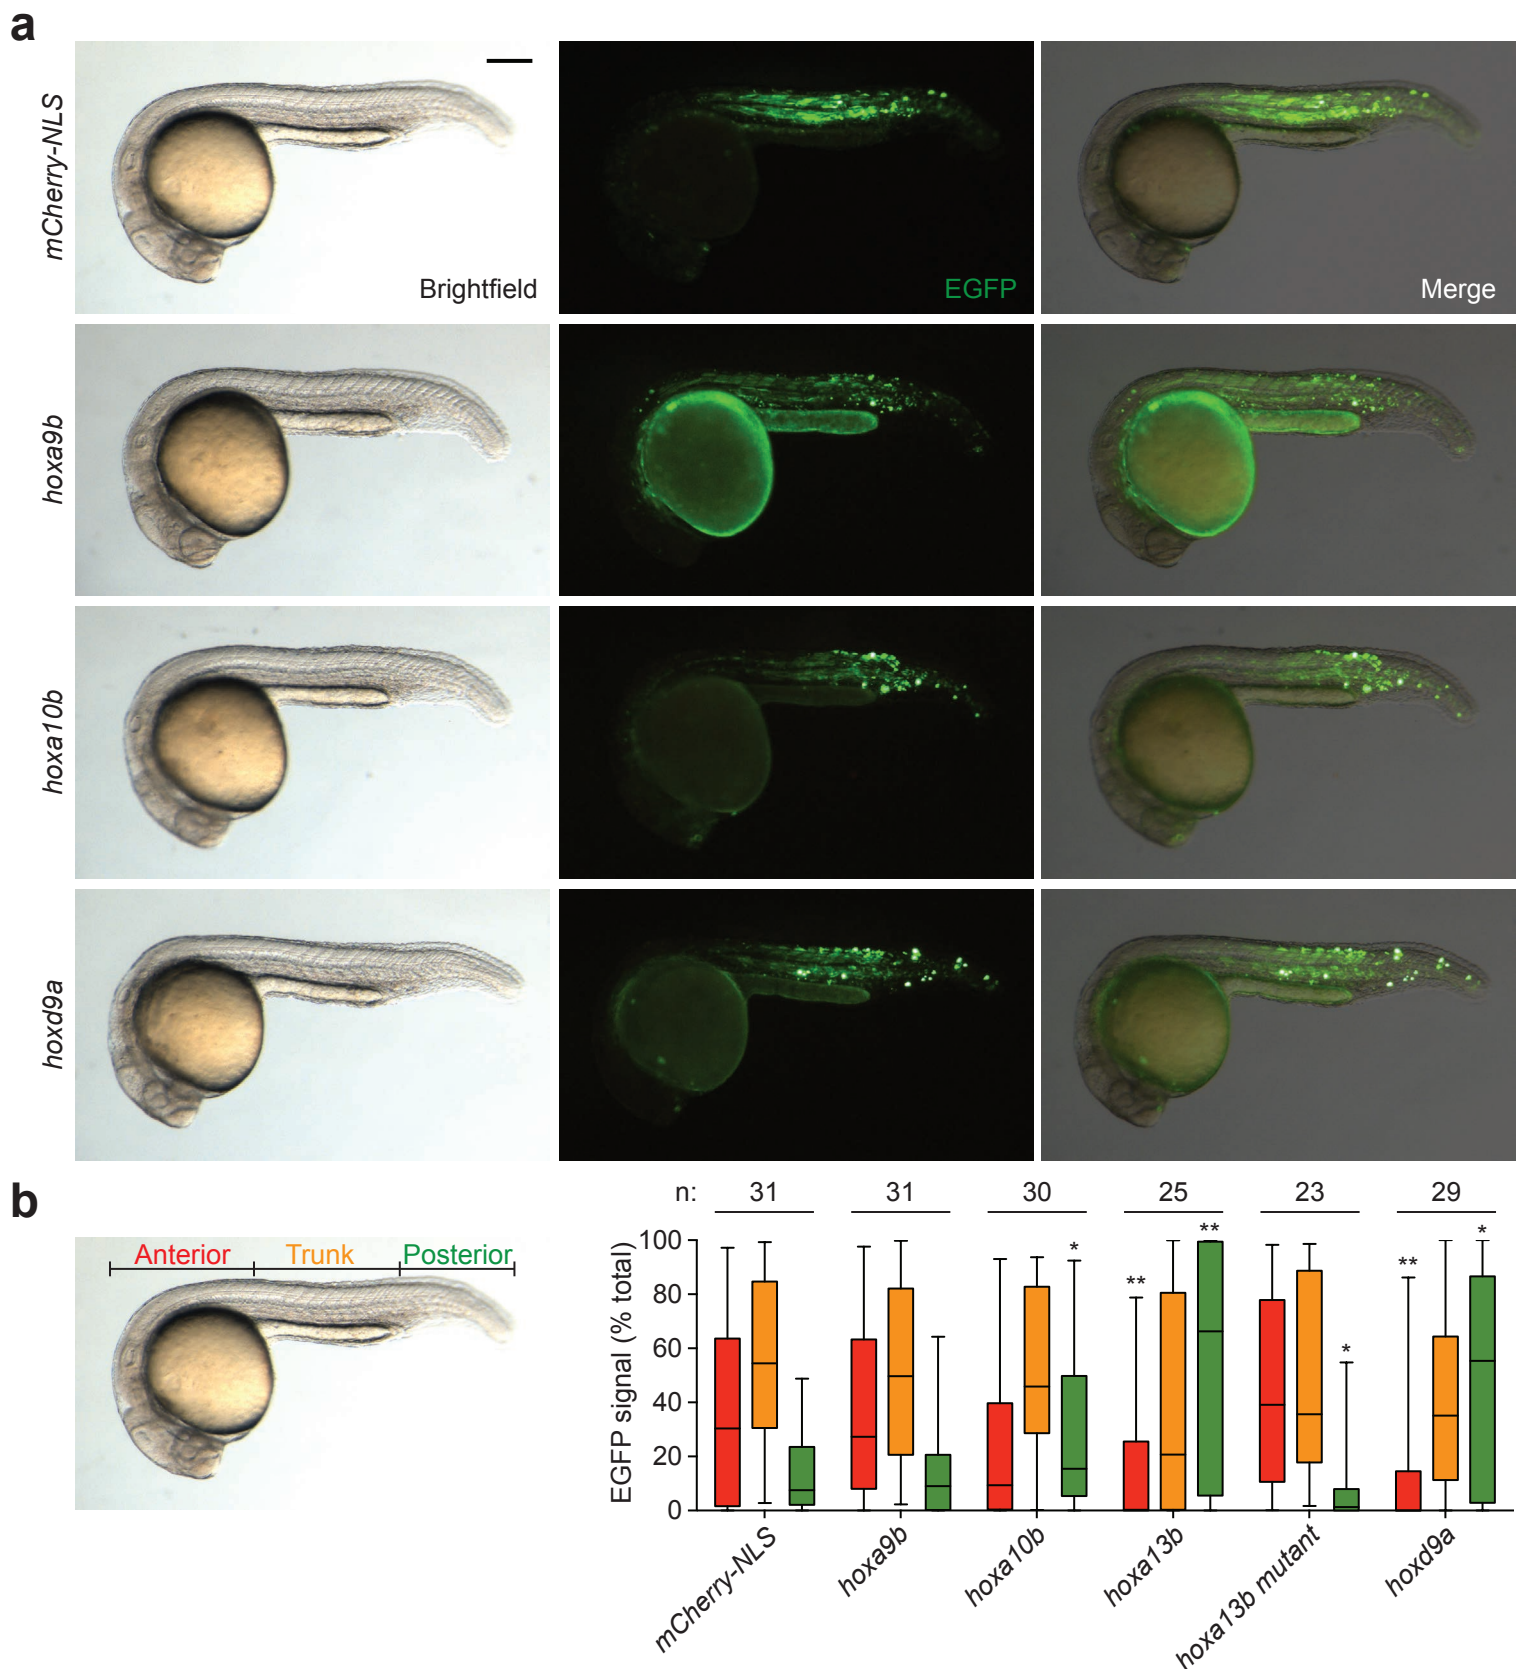

**Supplementary Figure 14. Multiple posterior *hox* genes can alter paraxial MPC localization.** (a) Representative anterior-posterior distributions of EGFP-positive cells in 22- to 24-hpf embryos injected with the designated *tbx16:EGFP-P2A-transgene* constructs at the 1- to 4-cell stage. (b) Anterior (red), trunk (orange), and posterior (green) regions of the body axis as delineated by the yolk extension boundaries and box-and-whisker plots of EGFP signals localized to each domain (excluding yolk cells) in the mosaic *tbx16:EGFP-P2A-transgene* embryos. Median values (horizontal lines), upper and lower quartiles (boxes), and maximum and minimum limits (whiskers) are shown. Five planned comparisons with the *mCherry-NLS* control were made for each region to obtain raw uncorrected *P*-values: \*,  $P < 0.05$ ; \*\*,  $P < 0.01$ . Embryo orientations for a and b: lateral view, anterior left. Scale bar: 200  $\mu\text{m}$ .

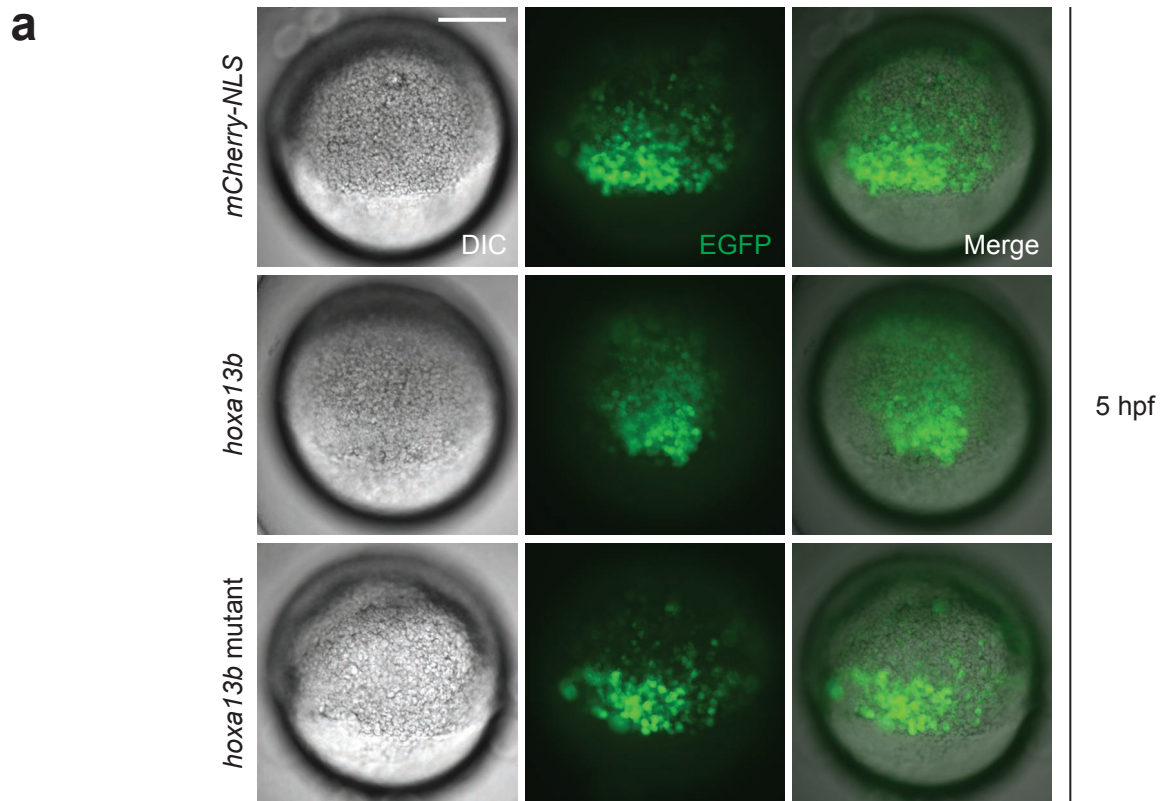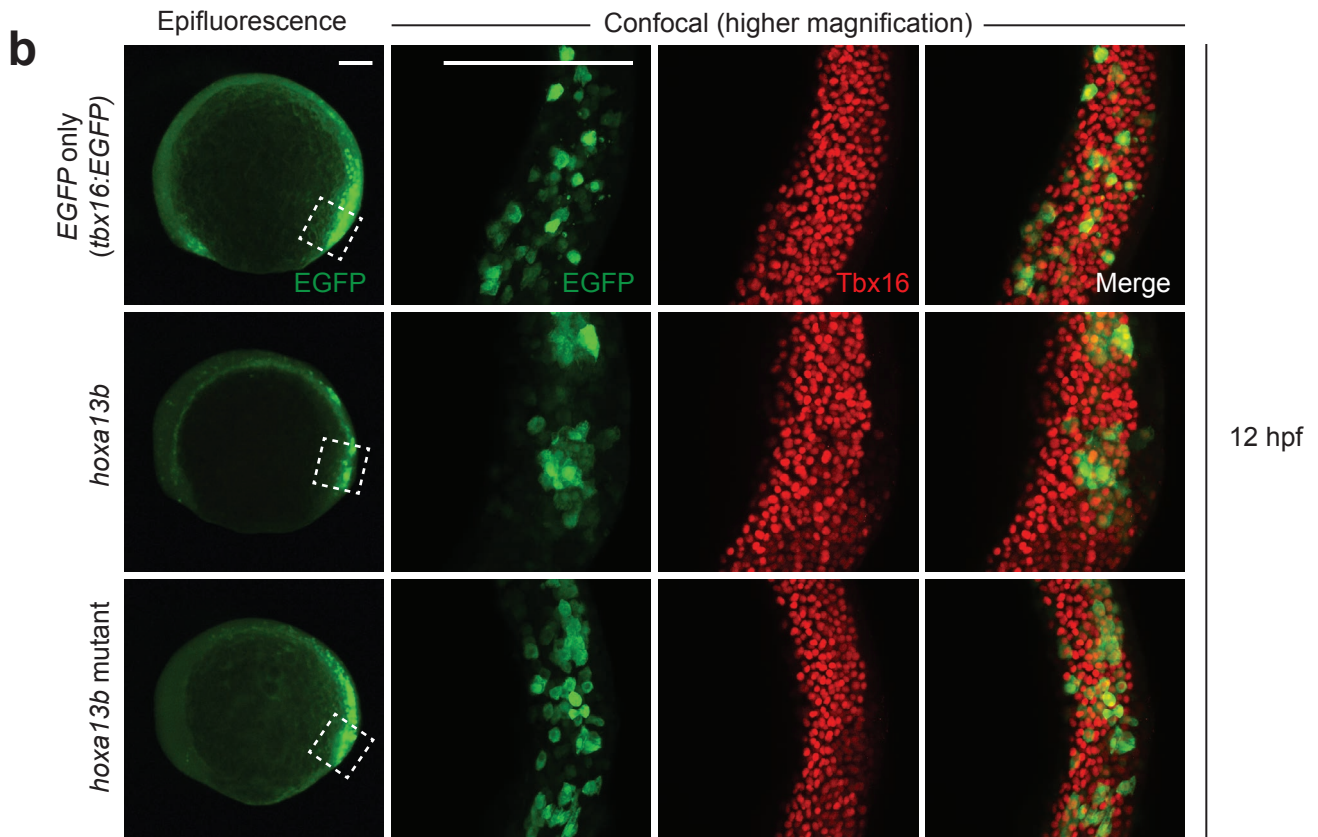

**Supplementary Figure 15. *hoxa13b* overexpression inhibits MPC movement without disrupting Tbx16 expression.** (a) Zebrafish zygotes were injected with *tbx16:EGFP-P2A-mCherry-NLS* or *tbx16:EGFP-P2A-hoxa13b* constructs and then tracked by differential interference contrast (DIC) and epifluorescence imaging throughout gastrulation. Robust Tbx16-dependent transgene expression could be observed by 5 hpf. (b) Epifluorescence and confocal imaging of immunostained mosaic embryos at 12 hpf, with regions demarcated by the dashed lines shown at higher magnification. Cells overexpressing *hoxa13b* retained the EGFP marker and maintained Tbx16 expression at this stage, by which point, they exhibit movement defects (see Supplementary Figure 16 and Supplementary Movie 3). Embryo orientations: a, margin view, animal pole up; b, lateral view, dorsal up. Scale bars: a, 200  $\mu$ m; b, 100  $\mu$ m.

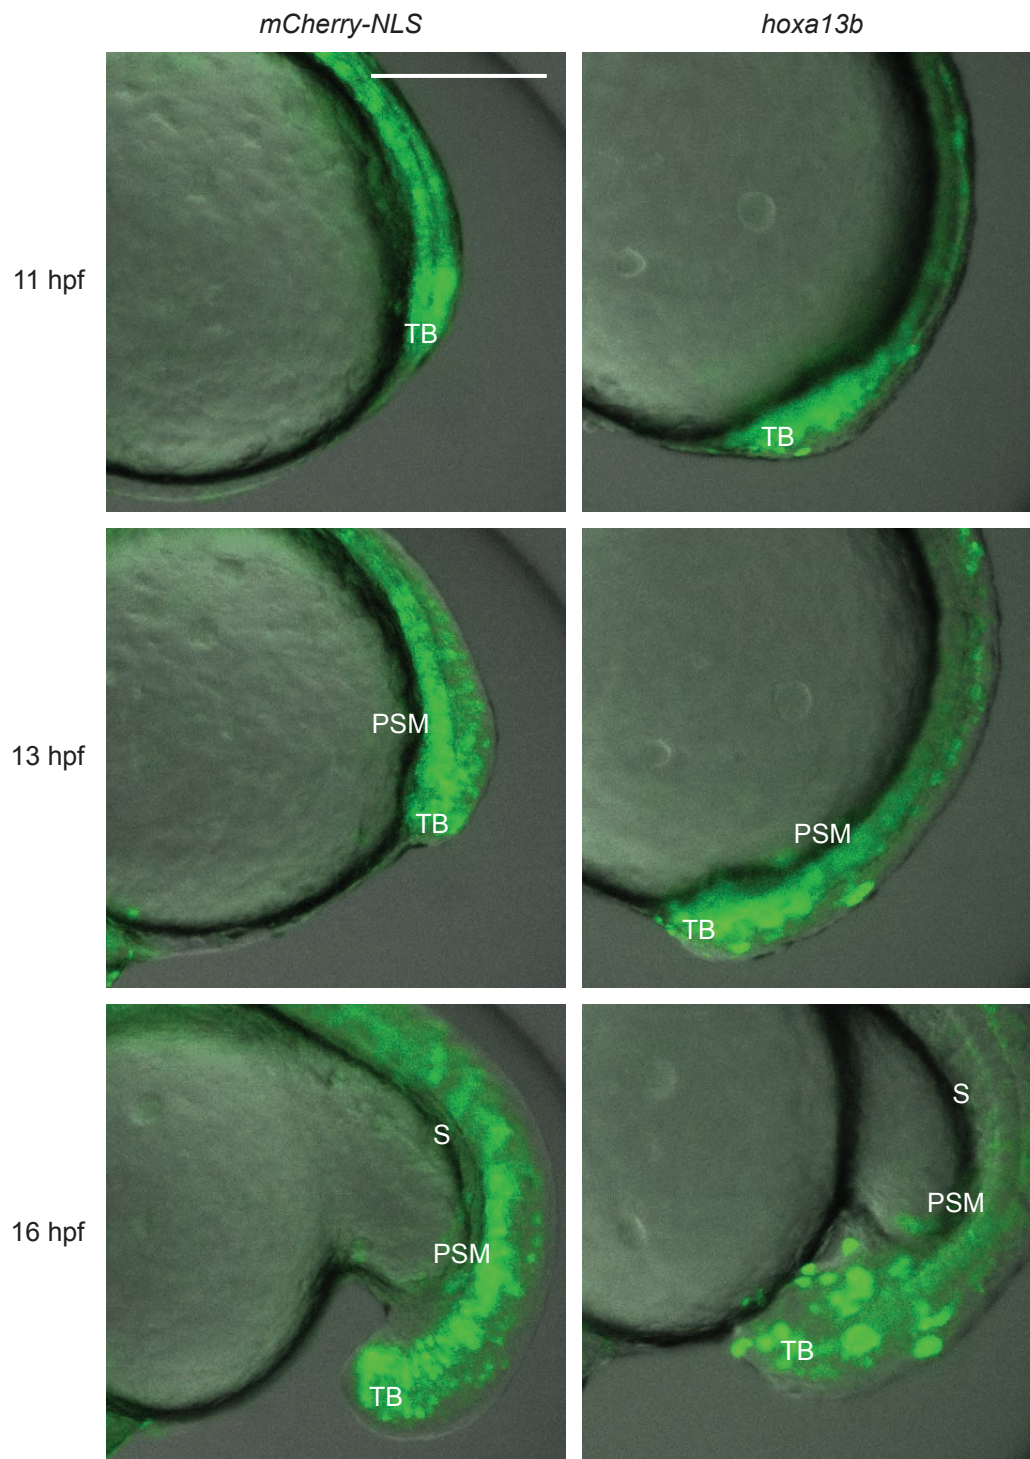

**Supplementary Figure 16. *hoxa13b* overexpression inhibits MPC egression from the tailbud during early somitogenesis.** Zebrafish zygotes were injected with *tbx16:EGFP-P2A-mCherry-NLS* or *tbx16:EGFP-P2A-hoxa13b* constructs and then imaged during early somitogenesis. Micrographs of representative embryos at 11, 13, and 16 hpf are shown, demonstrating the *hoxa13b*-suppressed movement of MPCs from the tailbud into the presomitic mesoderm. Tailbud (TB), presomitic mesoderm (PSM), and somitic (S) tissues are labeled. Embryo orientations: lateral view, dorsal up, posterior right. Scale bar: 200  $\mu$ m. The complete time-lapse videos of these cell movements during early somitogenesis (10.5 to 16.25 hpf) are available as Supplementary Movie 3.

## SUPPLEMENTARY MOVIES

**Supplementary Movie 1. Ventral MPCs lacking Tbx16 function do not exhibit movement defects during gastrulation.** Time-lapse imaging of embryos injected with either *Kaede-NLS* mRNA alone or in combination with the *tbx16* cMO and spot-irradiated in the ventral margin at 6 hpf. Optically targeted cells can then be identified by the red fluorescence of photoconverted Kaede-NLS protein. Morphogenetic movements from 6 hpf to 9 hpf were imaged at a rate of 1 frame/5 minutes, and the movie is shown at a rate of 10 frames (50 minutes of development)/second. Embryo orientations: ventral view, animal pole up. Scale bar: 200  $\mu$ m. The same embryos were imaged at later stages to generate Supplementary Movie 2.

**Supplementary Movie 2. Ventral MPCs lacking Tbx16 function exhibit movement defects during somitogenesis.** Time-lapse imaging of embryos injected with either *Kaede-NLS* mRNA alone or in combination with the *tbx16* cMO and spot-irradiated in the ventral margin at 6 hpf. Optically targeted cells can then be identified by the red fluorescence of photoconverted Kaede-NLS protein. Morphogenetic movements from 10.5 to 17 hpf were imaged at a rate of 1 frame/5 minutes, and movie is shown a rate of 10 frames (50 minutes of development)/second. Embryo orientations: lateral view, dorsal up. Scale bar: 200  $\mu$ m. The same embryos were imaged at earlier stages to generate Supplementary Movie 1.

**Supplementary Movie 3. MPCs overexpressing *hoxa13b* exhibit movement defects during somitogenesis.** Time-lapse imaging of embryos injected with either *tbx16:EGFP-P2A-mCherry-NLS* or *tbx16:EGFP-P2A-hoxa13b-NLS* constructs at the 1- to 4-cell stage. Morphogenetic movements from 10.5 to 16.25 hpf were imaged at a rate of 1 frame/5 minutes, and movie is

shown a rate of 10 frames (50 minutes of development)/second. Embryo orientations: lateral view, dorsal up. Scale bar: 200  $\mu\text{m}$ .

## REFERENCES

1. Thisse, B. *et al.* (2001) Expression of the zebrafish genome during embryogenesis (NIH R01 RR15402). ZFIN Direct Data Submission (<http://zfin.org>).
2. Murakami, T., Hijikata, T., Matsukawa, M., Ishikawa, H. & Yorifuji, H. Zebrafish protocadherin 10 is involved in paraxial mesoderm development and somitogenesis. *Dev. Dyn.* 235, 506-514 (2006).
3. Garnett, A.T. *et al.* Identification of direct T-box target genes in the developing zebrafish mesoderm. *Development* 136, 749-760 (2009).
4. Mueller, R.L., Huang, C. & Ho, R.K. Spatio-temporal regulation of Wnt and retinoic acid signaling by *tbx16/spadetail* during zebrafish mesoderm differentiation. *BMC Genomics* 11, 492 (2010).
5. Mishima, Y. *et al.* Zebrafish miR-1 and miR-133 shape muscle gene expression and regulate sarcomeric actin organization. *Genes Dev.* 23, 619-632 (2009).
6. Kawamura, A. *et al.* Groucho-associated transcriptional repressor *rippy1* is required for proper transition from the presomitic mesoderm to somites. *Dev. Cell* 9, 735-744 (2005).
7. He, Y. *et al.* Maternal control of axial-paraxial mesoderm patterning via direct transcriptional repression in zebrafish. *Dev. Biol.* 386, 96-110 (2014).
8. Yamamoto, A. *et al.* Zebrafish paraxial protocadherin is a downstream target of *spadetail* involved in morphogenesis of gastrula mesoderm. *Development* 125, 3389-3397 (1998).
9. Thisse, B. & Thisse, C. (2005) High Throughput Expression Analysis of ZF-Models Consortium Clones. ZFIN Direct Data Submission (<http://zfin.org>).
10. Sieger, D., Tautz, D. & Gajewski, M. *her11* is involved in the somitogenesis clock in zebrafish. *Dev. Genes Evol.* 214, 393-406 (2004).

11. Brown, J.L. *et al.* Transcriptional profiling of endogenous germ layer precursor cells identifies *dusp4* as an essential gene in zebrafish endoderm specification. *Proc. Natl. Acad. Sci. U. S. A.* 105, 12337-12342 (2008).
12. Hagos, E.G. & Dougan, S.T. Time-dependent patterning of the mesoderm and endoderm by Nodal signals in zebrafish. *BMC Dev. Biol.* 7, 22 (2007).
13. Thisse, B. & Thisse, C. (2004) Fast Release Clones: A High Throughput Expression Analysis. ZFIN Direct Data Submission (<http://zfin.org>).
14. Thisse, B., Wright, G.J. & Thisse, C. (2008) Embryonic and Larval Expression Patterns from a Large Scale Screening for Novel Low Affinity Extracellular Protein Interactions. ZFIN Direct Data Submission (<http://zfin.org>).
15. Fior, R. *et al.* The differentiation and movement of presomitic mesoderm progenitor cells are controlled by Mesogenin 1. *Development* 139, 4656-4665 (2012).
16. Yabe, T. & Takada, S. Mesogenin causes embryonic mesoderm progenitors to differentiate during development of zebrafish tail somites. *Dev. Biol.* 370, 213-222 (2012).
17. Bakkers, J. *et al.* Has2 is required upstream of Rac1 to govern dorsal migration of lateral cells during zebrafish gastrulation. *Development* 131, 525-537 (2004).
18. Ochi, H., Pearson, B.J., Chuang, P.T., Hammerschmidt, M. & Westerfield, M. Hhip regulates zebrafish muscle development by both sequestering Hedgehog and modulating localization of Smoothed. *Dev. Biol.* 297, 127-140 (2006).
19. Chong, S.W., Nguyet, L.M., Jiang, Y.J. & Korzh, V. The chemokine Sdf-1 and its receptor Cxcr4 are required for formation of muscle in zebrafish. *BMC Dev. Biol.* 7, 54 (2007).
20. Miyake, A. *et al.* Neucrin, a novel secreted antagonist of canonical Wnt signaling, plays roles in developing neural tissues in zebrafish. *Mech. Dev.* 128, 577-590 (2012).

21. Pezeron, G. *et al.* Duplicate *sfrp1* genes in zebrafish: *sfrp1a* is dynamically expressed in the developing central nervous system, gut and lateral line. *Gene Expr. Patterns* 6, 835-842 (2006).
22. Topczewska, J.M. *et al.* The winged helix transcription factor *Foxc1a* is essential for somitogenesis in zebrafish. *Genes Dev.* 15, 2483-2493 (2001).
23. Yao, S. *et al.* *Pnas4* is a novel regulator for convergence and extension during vertebrate gastrulation. *FEBS Lett.* 582, 2325-2332 (2008).
24. Costa, A.M. *et al.* GRG5/AES interacts with T-cell factor 4 (TCF4) and downregulates Wnt signaling in human cells and zebrafish embryos. *PLoS One* 8, e67694 (2013).
25. Feng, L., Hernandez, R.E., Waxman, J.S., Yelon, D. & Moens, C.B. *Dhrs3a* regulates retinoic acid biosynthesis through a feedback inhibition mechanism. *Dev. Biol.* 338, 1-14 (2010).
26. Begemann, G., Schilling, T.F., Rauch, G.J., Geisler, R. & Ingham, P.W. The zebrafish neckless mutation reveals a requirement for *raldh2* in mesodermal signals that pattern the hindbrain. *Development* 128, 3081-3094 (2001).
27. Kudoh, T. *et al.* A gene expression screen in zebrafish embryogenesis. *Genome Res.* 11, 1979-1987 (2001).
28. Feldman, B. *et al.* Lefty antagonism of Squint is essential for normal gastrulation. *Curr. Biol.* 12, 2129-2135 (2002).
29. Draper, B.W., Stock, D.W. & Kimmel, C.B. Zebrafish *fgf24* functions with *fgf8* to promote posterior mesodermal development. *Development* 130, 4639-4654 (2003).
30. Wang, H. *et al.* Isolation and expression of zebrafish zinc-finger transcription factor gene *tsh1*. *Gene Expr. Patterns* 7, 318-322 (2007).



31. Nornes, S., Tucker, B. & Lardelli, M. Zebrafish *aplnra* functions in epiboly. *BMC Res. Notes* 2, 231 (2009).
32. Julich, D., Geisler, R. & Holley, S.A. Integrin $\alpha$ 5 and delta/notch signaling have complementary spatiotemporal requirements during zebrafish somitogenesis. *Dev. Cell* 8, 575-586 (2005).
33. Gillhouse, M., Wagner Nyholm, M., Hikasa, H., Sokol, S.Y. & Grinblat, Y. Two *Frodo/Dapper* homologs are expressed in the developing brain and mesoderm of zebrafish. *Dev. Dyn.* 230, 403-409 (2004).
34. Zeng, X.X., Wilm, T.P., Sepich, D.S. & Solnica-Krezel, L. *Apelin* and its receptor control heart field formation during zebrafish gastrulation. *Dev. Cell* 12, 391-402 (2007).
35. Kobayashi, M., Osanai, H., Kawakami, K. & Yamamoto, M. Expression of three zebrafish *Six4* genes in the cranial sensory placodes and the developing somites. *Mech. Dev.* 98, 151-155 (2000).
36. Oates, A.C. & Ho, R.K. *Hairy/E(spl)*-related (*Her*) genes are central components of the segmentation oscillator and display redundancy with the *Delta/Notch* signaling pathway in the formation of anterior segmental boundaries in the zebrafish. *Development* 129, 2929-2946 (2002).
37. Nikaido, M., Law, E.W. & Kelsh, R.N. A systematic survey of expression and function of zebrafish *frizzled* genes. *PLoS One* 8, e54833 (2013).
38. Fodor, E. *et al.* Full transcriptome analysis of early dorsoventral patterning in zebrafish. *PLoS One* 8, e70053 (2013).
39. Currie, P.D. & Ingham, P.W. Induction of a specific muscle cell type by a hedgehog-like protein in zebrafish. *Nature* 382, 452-455 (1996).

40. Amores, A. *et al.* Zebrafish hox clusters and vertebrate genome evolution. *Science* 282, 1711-1714 (1998).
41. Kim, G.Y. *et al.* HtrA1 is a novel antagonist controlling fibroblast growth factor (FGF) signaling via cleavage of FGF8. *Mol. Cell. Biol.* 32, 4482-4492 (2012).
42. Kai, M., Heisenberg, C.P. & Tada, M. Sphingosine-1-phosphate receptors regulate individual cell behaviours underlying the directed migration of prechordal plate progenitor cells during zebrafish gastrulation. *Development* 135, 3043-3051 (2008).
43. Srinivas, B.P., Woo, J., Leong, W.Y. & Roy, S. A conserved molecular pathway mediates myoblast fusion in insects and vertebrates. *Nat. Genet.* 39, 781-786 (2007).
44. Lukowski, C.M., Ritzel, R.G. & Waskiewicz, A.J. Expression of two *insm1*-like genes in the developing zebrafish nervous system. *Gene Expr. Patterns* 6, 711-718 (2006).
45. Choe, S.K., Zhang, X., Hirsch, N., Straubhaar, J. & Sagerstrom, C.G. A screen for *hoxb1*-regulated genes identifies *ppp1r14a1* as a regulator of the rhombomere 4 Fgf-signaling center. *Dev. Biol.* 358, 356-367 (2011).
46. Yu, X., Ng, C.P., Habacher, H. & Roy, S. Foxj1 transcription factors are master regulators of the motile ciliogenic program. *Nat. Genet.* 40, 1445-1453 (2008).
47. Qian, M. *et al.* ENC1-like integrates the retinoic acid/FGF signaling pathways to modulate ciliogenesis of Kupffer's Vesicle during zebrafish embryonic development. *Dev. Biol.* 374, 85-95 (2013).
48. Emoto, Y., Wada, H., Okamoto, H., Kudo, A. & Imai, Y. Retinoic acid-metabolizing enzyme Cyp26a1 is essential for determining territories of hindbrain and spinal cord in zebrafish. *Dev. Biol.* 278, 415-427 (2005).

49. Winkler, C., Schafer, M., Duschl, J., Scharl, M. & Volff, J.N. Functional divergence of two zebrafish midkine growth factors following fish-specific gene duplication. *Genome Res.* 13, 1067-1081 (2003).
50. Rohrschneider, M.R., Elsen, G.E. & Prince, V.E. Zebrafish Hoxb1a regulates multiple downstream genes including prickle1b. *Dev. Biol.* 309, 358-372 (2007).
51. Reifers, F. *et al.* Fgf8 is mutated in zebrafish acerebellar (ace) mutants and is required for maintenance of midbrain-hindbrain boundary development and somitogenesis. *Development* 125, 2381-2395 (1998).
52. Warga, R.M., Mueller, R.L., Ho, R.K. & Kane, D.A. Zebrafish Tbx16 regulates intermediate mesoderm cell fate by attenuating Fgf activity. *Dev. Biol.* 383, 75-89 (2013).
